# Supplementary material for: Zinc complexes supported by methyl salicylato ligands: synthesis, structure, and application in ring-opening polymerization of l-lactide
Source: Royal Society of Chemistry journal article supplement (doi:10.1039/c3dt51200b), 2013-01-01
Supplement: c3dt51200b.pdf [file c3dt51200b.pdf]

Supporting information for:

**Zinc complexes supported by methyl salicylato ligands: synthesis, structure, and application in ring-opening polymerization of L-lactide**

Rafał Petrus and Piotr Sobota \*

Faculty of Chemistry, University of Wrocław, 14 F. Joliot-Curie, 50-383 Wrocław, Poland

### Crystallographic Data for Compounds 1-2.

Table S1. Crystal and Data Collection Parameters for Compounds 1-2.

|                                                                                        | 1·CH <sub>2</sub> Cl <sub>2</sub>                                                                | 2·0.5C <sub>7</sub> H <sub>8</sub>                                                                |
|----------------------------------------------------------------------------------------|--------------------------------------------------------------------------------------------------|---------------------------------------------------------------------------------------------------|
| Chemical formula                                                                       | C <sub>64</sub> H <sub>56</sub> O <sub>24</sub> Zn <sub>4</sub> ·CH <sub>2</sub> Cl <sub>2</sub> | 2(C <sub>26</sub> H <sub>24</sub> N <sub>2</sub> O <sub>6</sub> Zn)·C <sub>7</sub> H <sub>8</sub> |
| Formula Mass                                                                           | 1555.57                                                                                          | 1143.86                                                                                           |
| Crystal system                                                                         | Triclinic                                                                                        | Monoclinic                                                                                        |
| Space group                                                                            | <i>P</i> $\bar{1}$                                                                               | <i>P</i> 2 <sub>1</sub> / <i>c</i>                                                                |
| <i>a</i> /Å                                                                            | 11.260(3)                                                                                        | 27.674(4)                                                                                         |
| <i>b</i> /Å                                                                            | 12.517(4)                                                                                        | 12.210(2)                                                                                         |
| <i>c</i> /Å                                                                            | 12.752(4)                                                                                        | 15.867(3)                                                                                         |
| $\alpha$ /°                                                                            | 66.13(3)                                                                                         |                                                                                                   |
| $\beta$ /°                                                                             | 75.17(3)                                                                                         | 92.47(2)                                                                                          |
| $\gamma$ /°                                                                            | 76.07(3)                                                                                         |                                                                                                   |
| Unit cell volume/Å <sup>3</sup>                                                        | 1569.6(8)                                                                                        | 5356.5(15)                                                                                        |
| Temperature/K                                                                          | 100(2)                                                                                           | 100(2)                                                                                            |
| <i>Z</i>                                                                               | 1                                                                                                | 4                                                                                                 |
| Radiation type                                                                         | MoK $\alpha$                                                                                     | MoK $\alpha$                                                                                      |
| Absorption coefficient, $\mu$ /mm <sup>-1</sup>                                        | 1.679                                                                                            | 0.963                                                                                             |
| No. of reflections measured                                                            | 17541                                                                                            | 58176                                                                                             |
| No. of independent reflections                                                         | 6833                                                                                             | 11695                                                                                             |
| <i>R</i> <sub>int</sub>                                                                | 0.0318                                                                                           | 0.0547                                                                                            |
| Final <i>R</i> <sub><i>I</i></sub> values ( <i>I</i> > 2 $\sigma$ ( <i>I</i> ))        | 0.0336                                                                                           | 0.0333                                                                                            |
| Final <i>wR</i> ( <i>F</i> <sup>2</sup> ) values ( <i>I</i> > 2 $\sigma$ ( <i>I</i> )) | 0.0800                                                                                           | 0.0737                                                                                            |
| Final <i>R</i> <sub><i>I</i></sub> values (all data)                                   | 0.0500                                                                                           | 0.0621                                                                                            |
| Final <i>wR</i> ( <i>F</i> <sup>2</sup> ) values (all data)                            | 0.0844                                                                                           | 0.0796                                                                                            |
| Goodness of fit on <i>F</i> <sup>2</sup>                                               | 0.975                                                                                            | 0.0871                                                                                            |
| $\Delta\rho$ <sub>max</sub> /eÅ <sup>-3</sup>                                          | 0.67                                                                                             | 0.69                                                                                              |
| $\Delta\rho$ <sub>min</sub> /eÅ <sup>-3</sup>                                          | -0.45                                                                                            | -0.34                                                                                             |

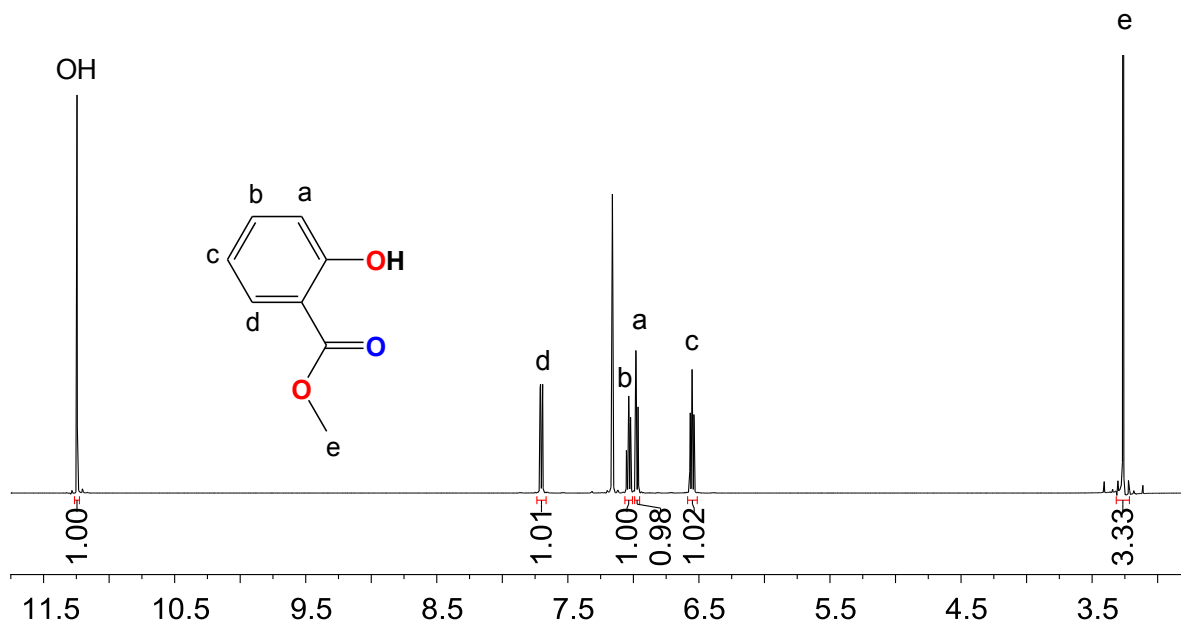

S1.  $^1\text{H}$  NMR spectrum of MesalOH ligand in  $\text{C}_6\text{D}_6$ .

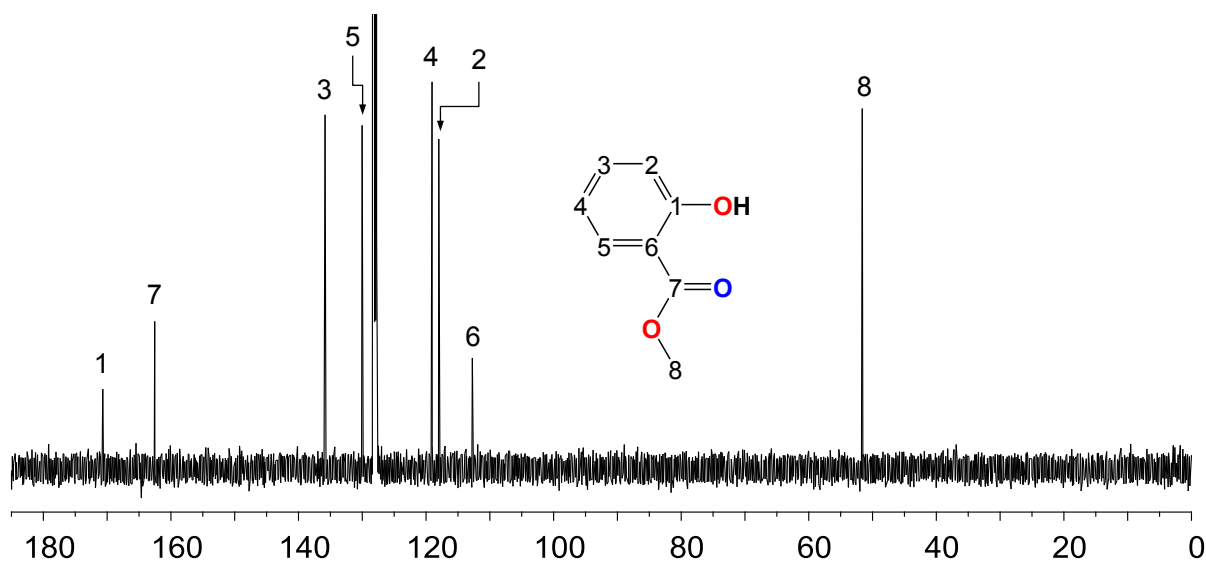

S2.  $^{13}\text{C}$  NMR spectrum of MesalOH ligand in  $\text{C}_6\text{D}_6$ .

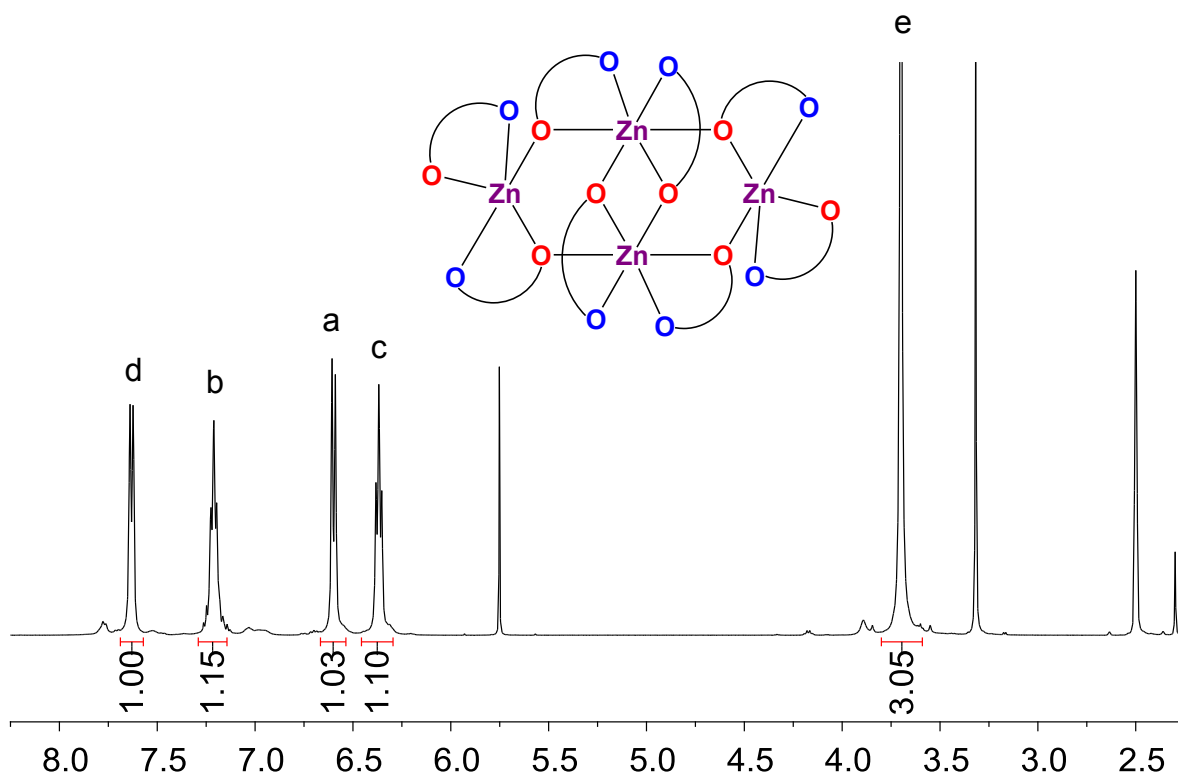

S3.  $^1\text{H}$  NMR spectrum of **1** in  $\text{DMSO-}D_6$ .

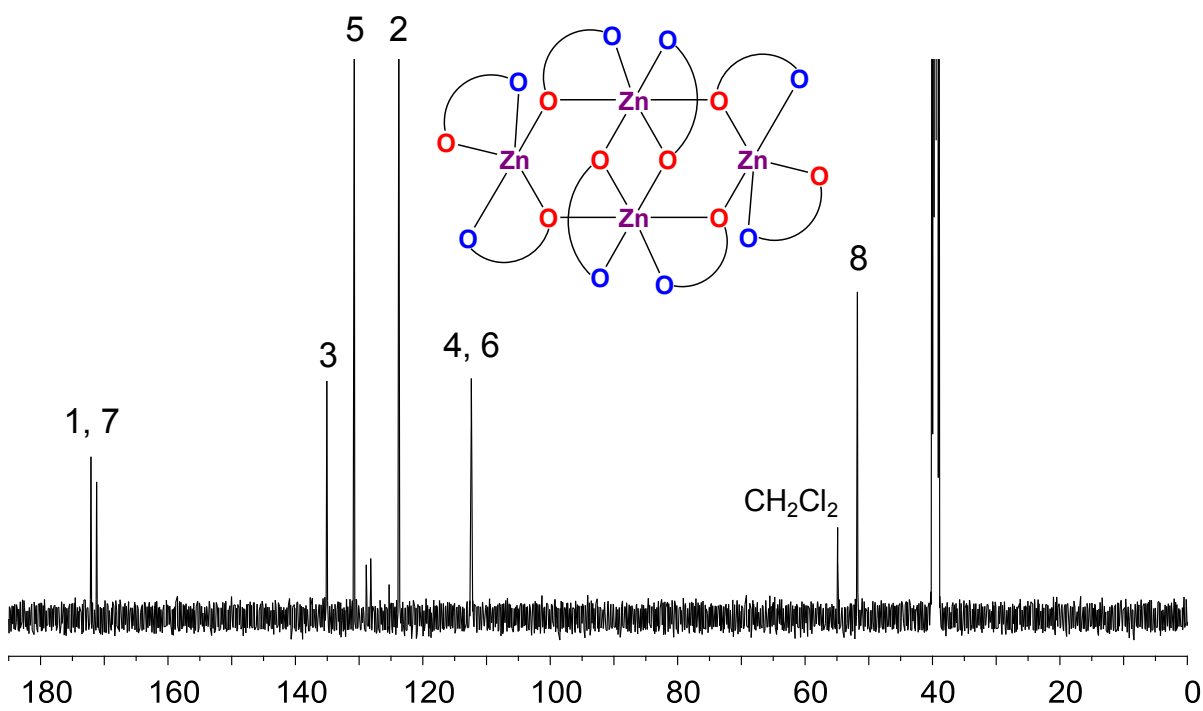

S4.  $^{13}\text{C}$  NMR spectrum of **1** in  $\text{DMSO-}D_6$ .

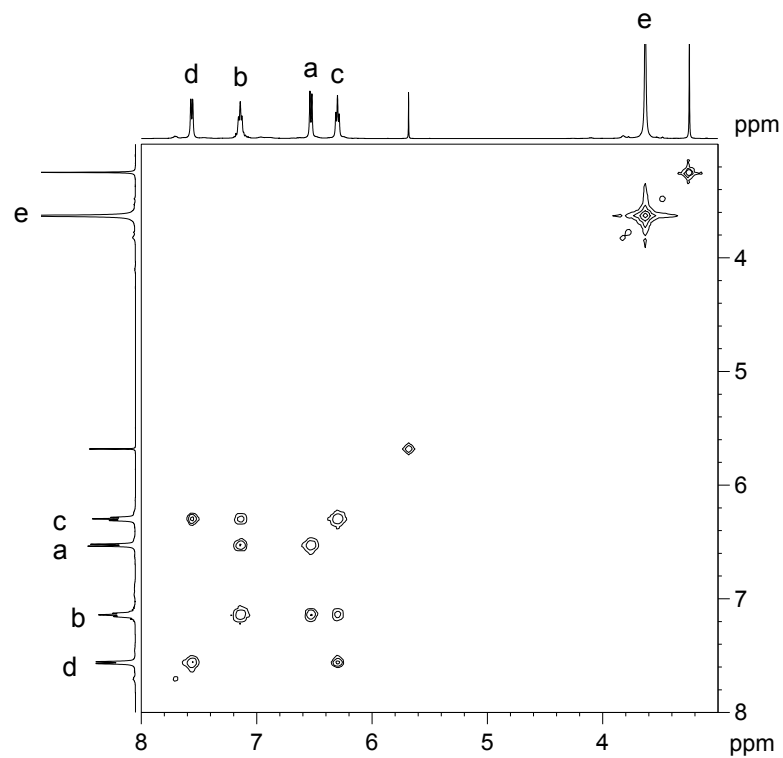

S5. COSY NMR spectrum of **1** in DMSO-D<sub>6</sub>.

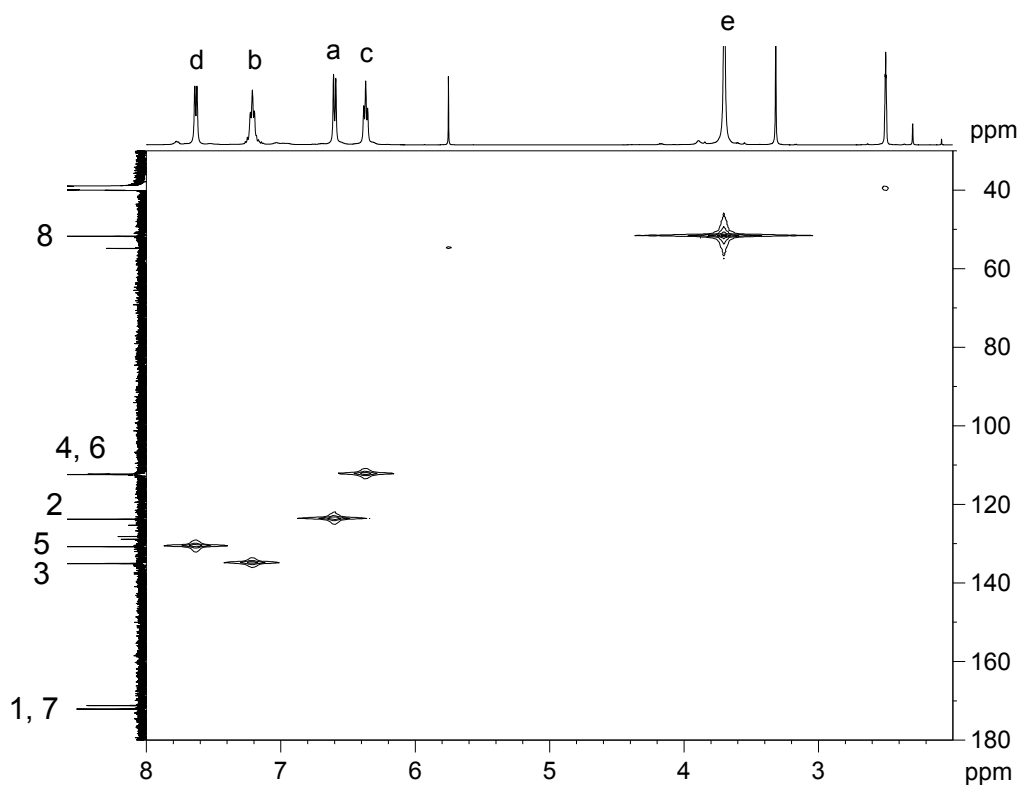

S6. HMQC NMR spectrum of **1** in DMSO-D<sub>6</sub>.

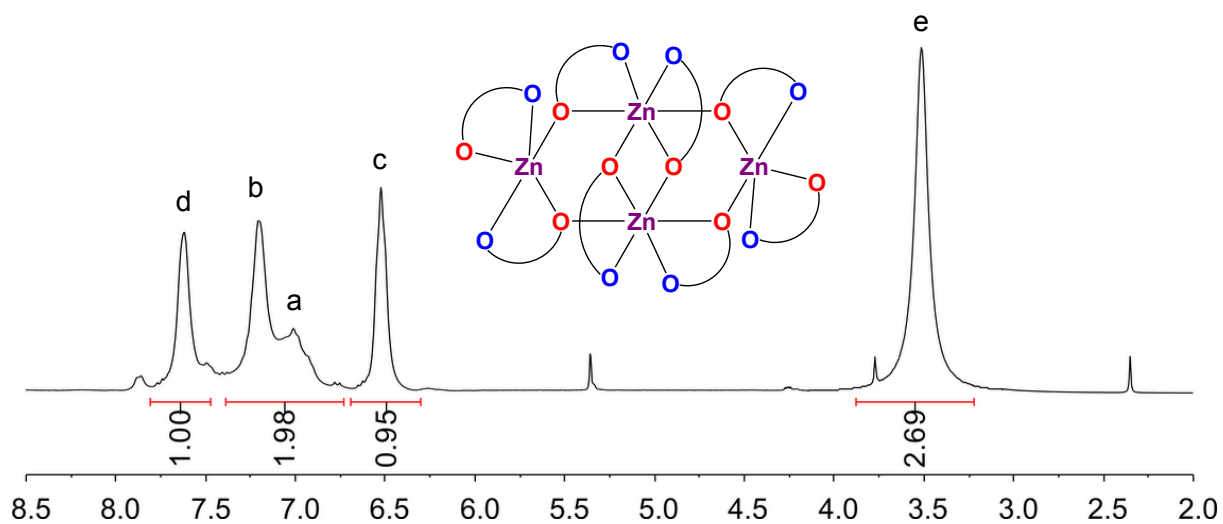

S7.  $^1\text{H}$  NMR spectrum of **1** in  $\text{CD}_2\text{Cl}_2$ .

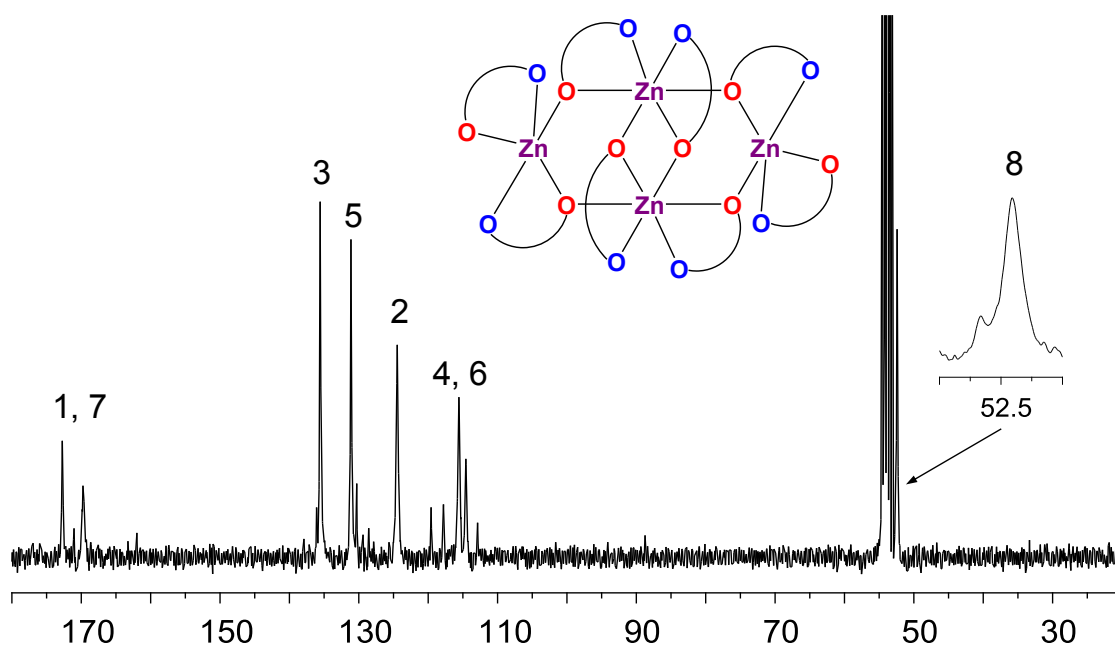

S8.  $^{13}\text{C}$  NMR spectrum of **1** in  $\text{CD}_2\text{Cl}_2$ .

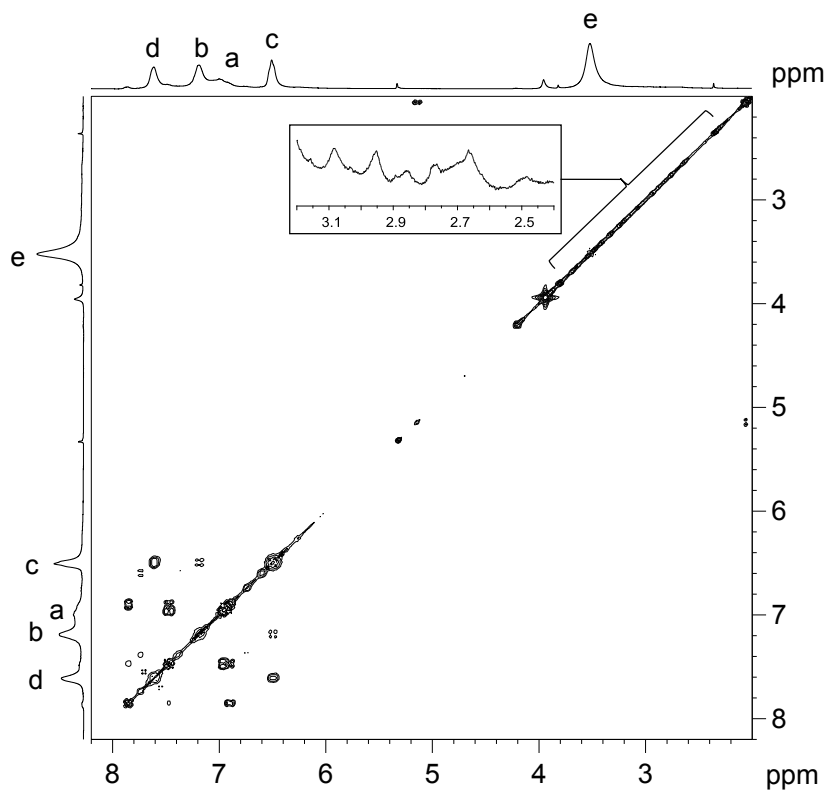

S9. COSY NMR spectrum of **1** in CD<sub>2</sub>Cl<sub>2</sub>.

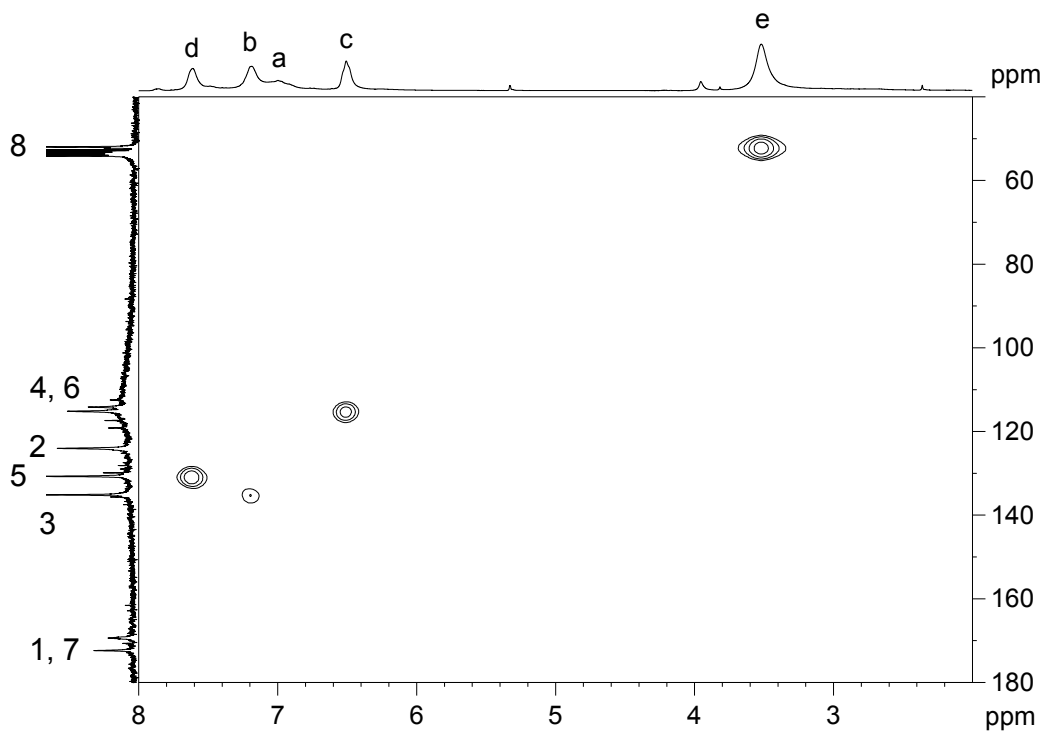

S10. HMQC NMR spectrum of **1** in CD<sub>2</sub>Cl<sub>2</sub>.

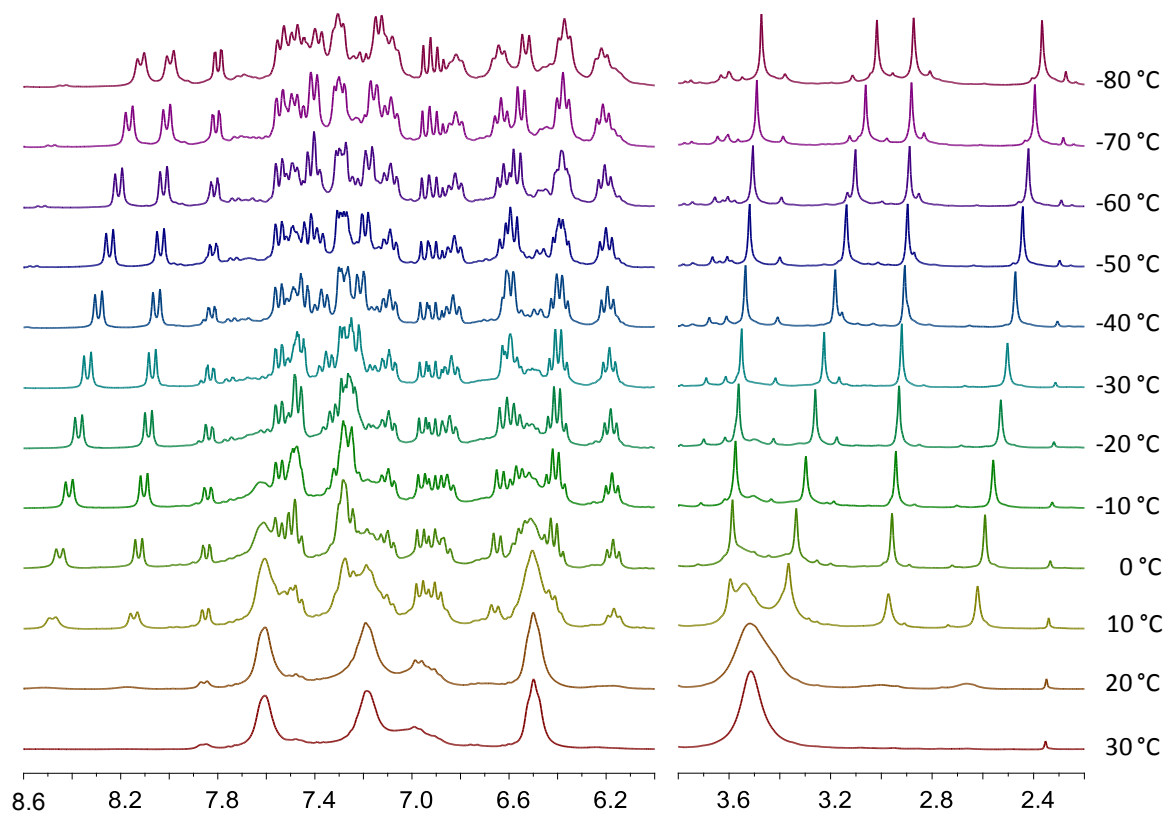

S11. VT  $^1\text{H}$  NMR spectra of **1** in  $\text{CD}_2\text{Cl}_2$ .

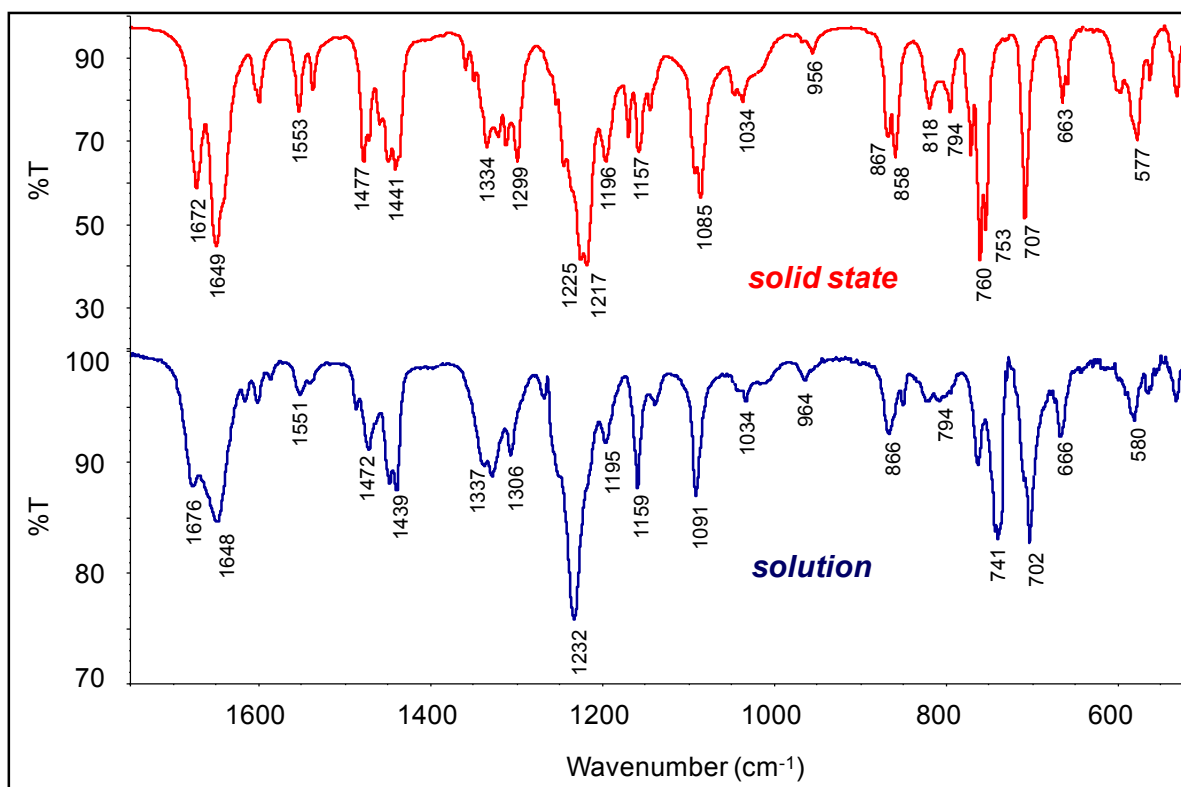

S12. FTIR-ATR spectra of **1** in solid state and in  $\text{CH}_2\text{Cl}_2$  solution.



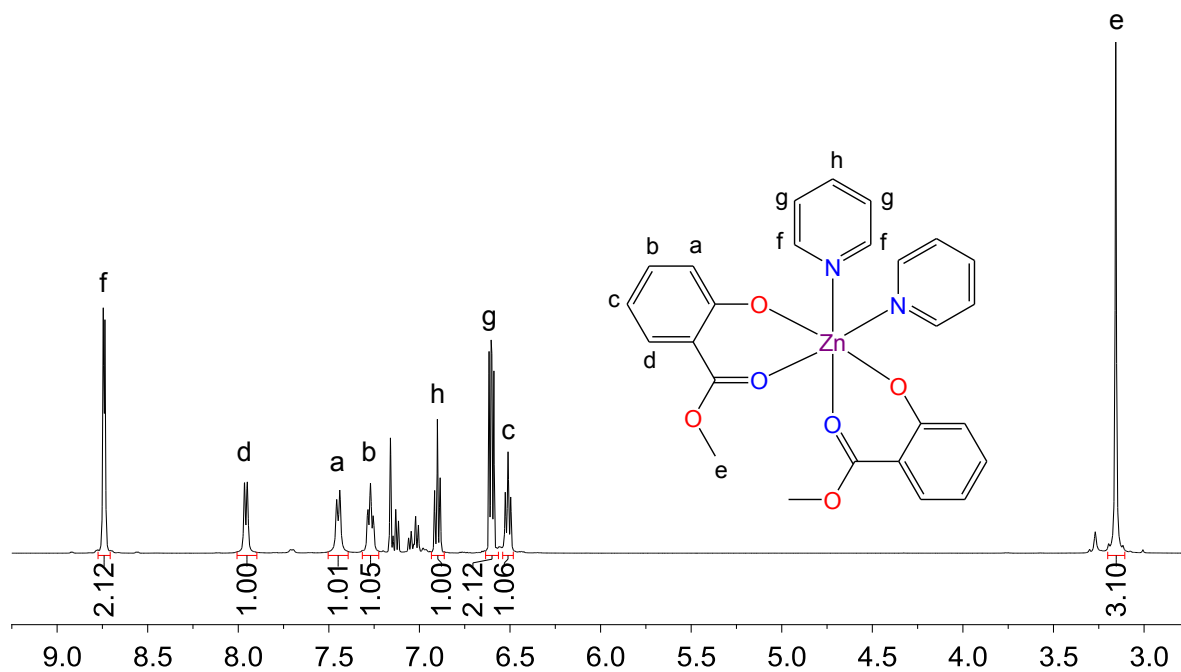

S13.  $^1\text{H}$  NMR spectrum of **2** in  $\text{C}_6\text{D}_6$ .

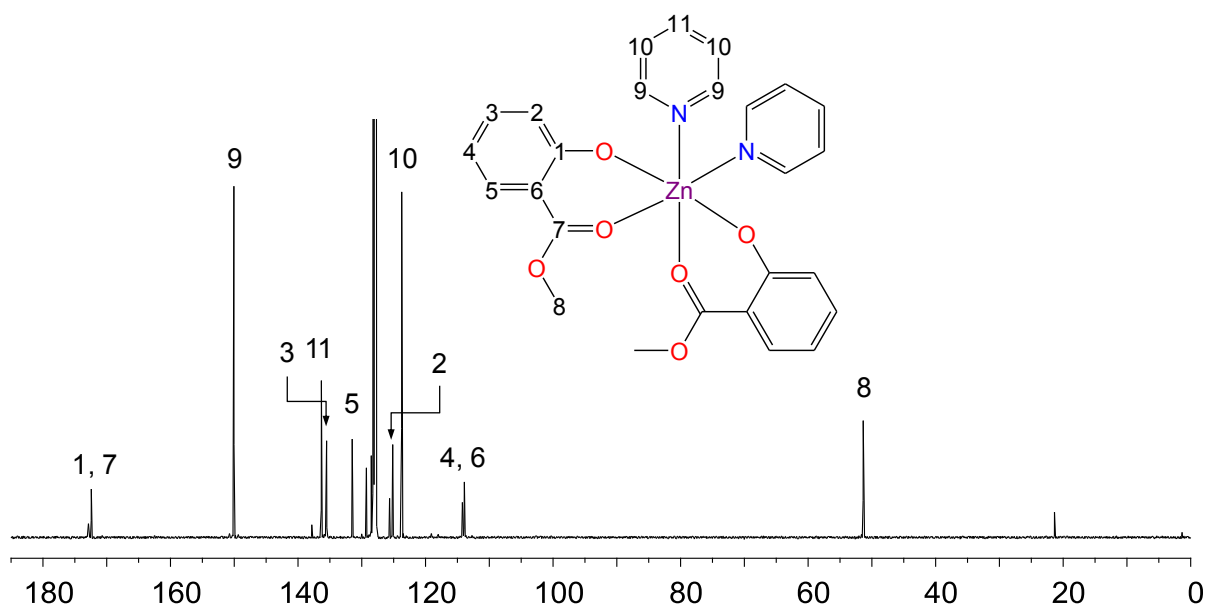

S14.  $^{13}\text{C}$  NMR spectrum of **2** in  $\text{C}_6\text{D}_6$ .

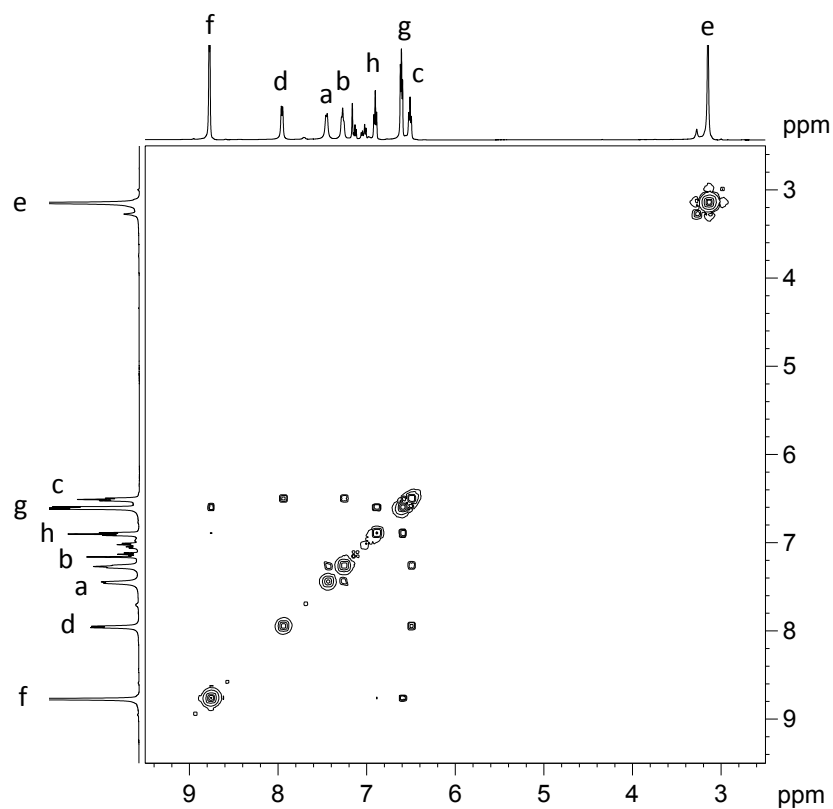

S15. COSY NMR spectrum of **2** in C<sub>6</sub>D<sub>6</sub>.

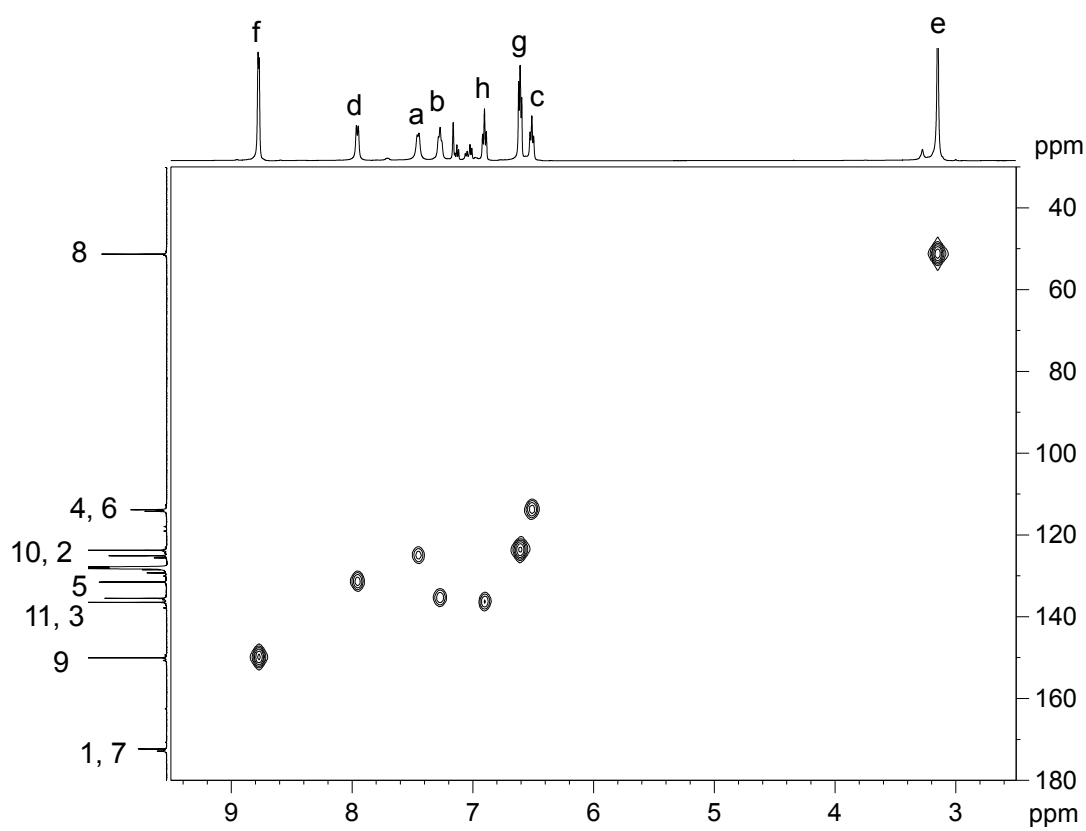

S16. HMQC NMR spectrum of **2** in C<sub>6</sub>D<sub>6</sub>.

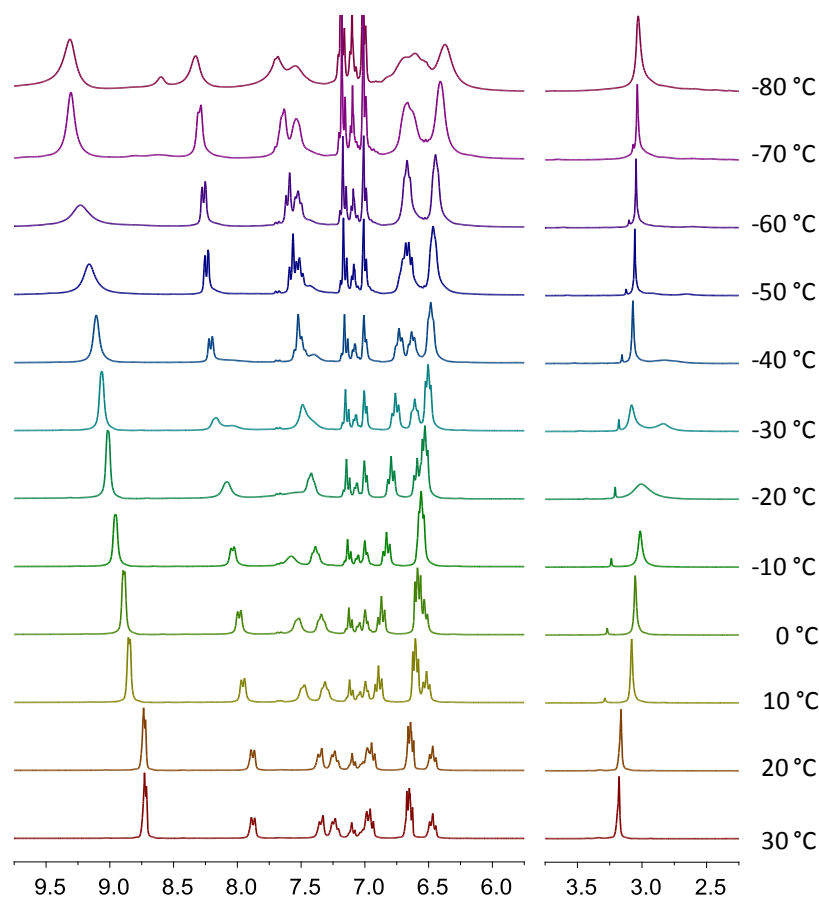

S17. VT <sup>1</sup>H NMR spectra of **2** in C<sub>7</sub>D<sub>8</sub>.

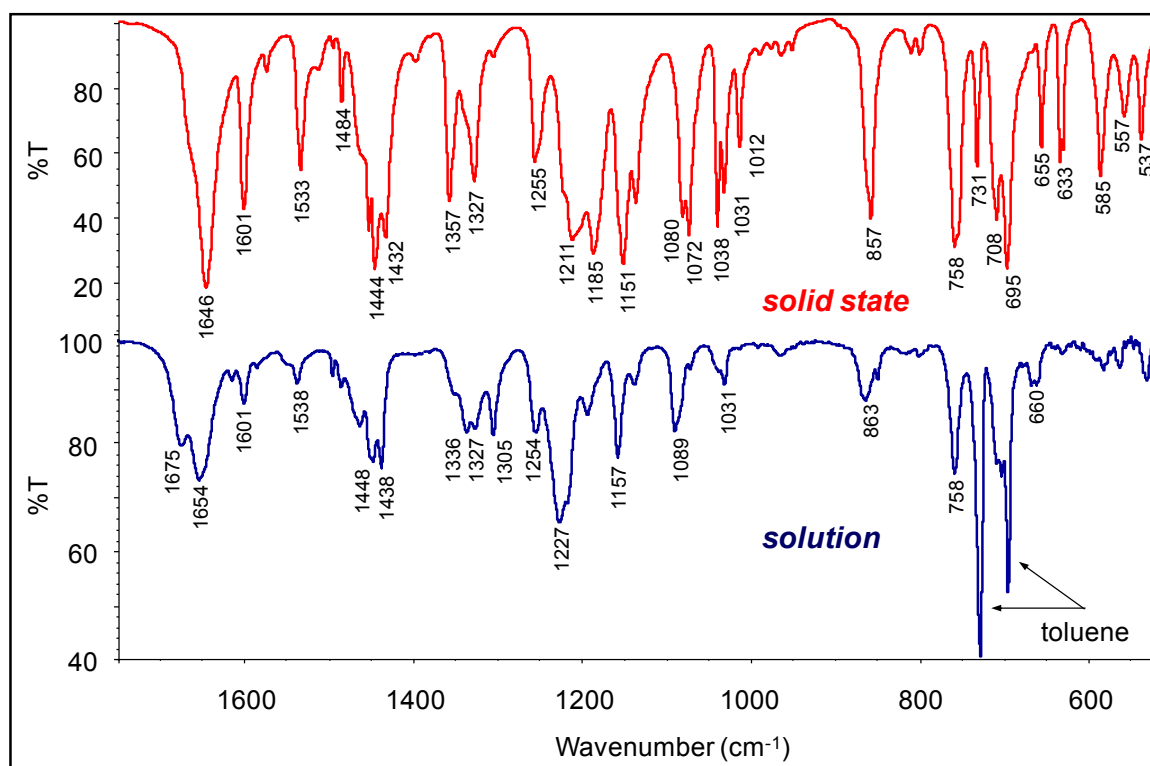

S18. FTIR-ATR spectra of **2** in solid state and in toluene solution.

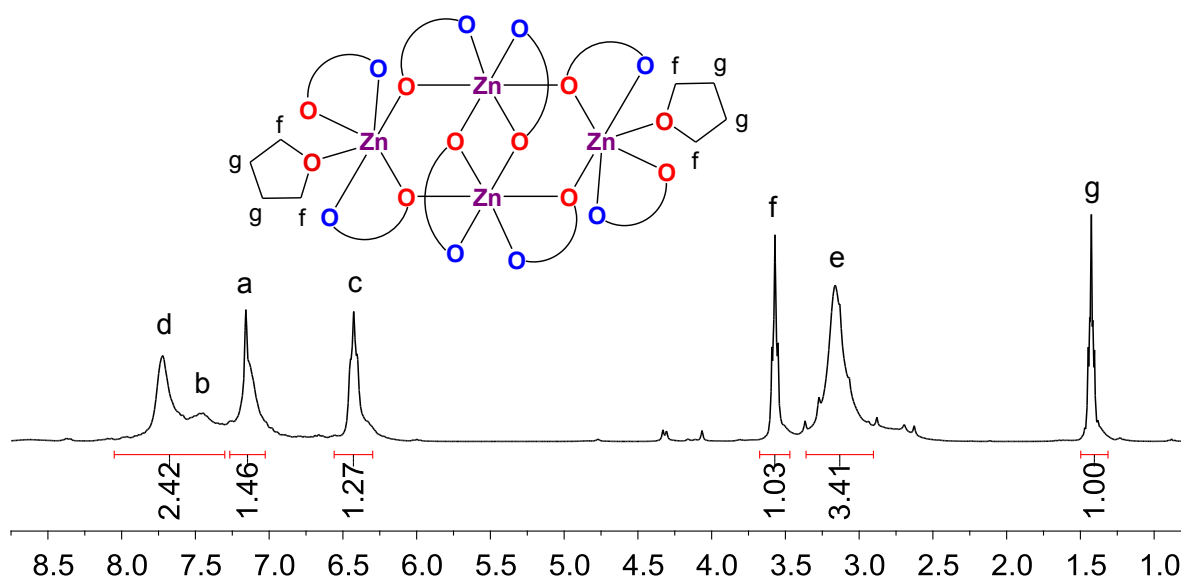

S19. <sup>1</sup>H NMR spectrum of **1**·2THF in C<sub>6</sub>D<sub>6</sub>.

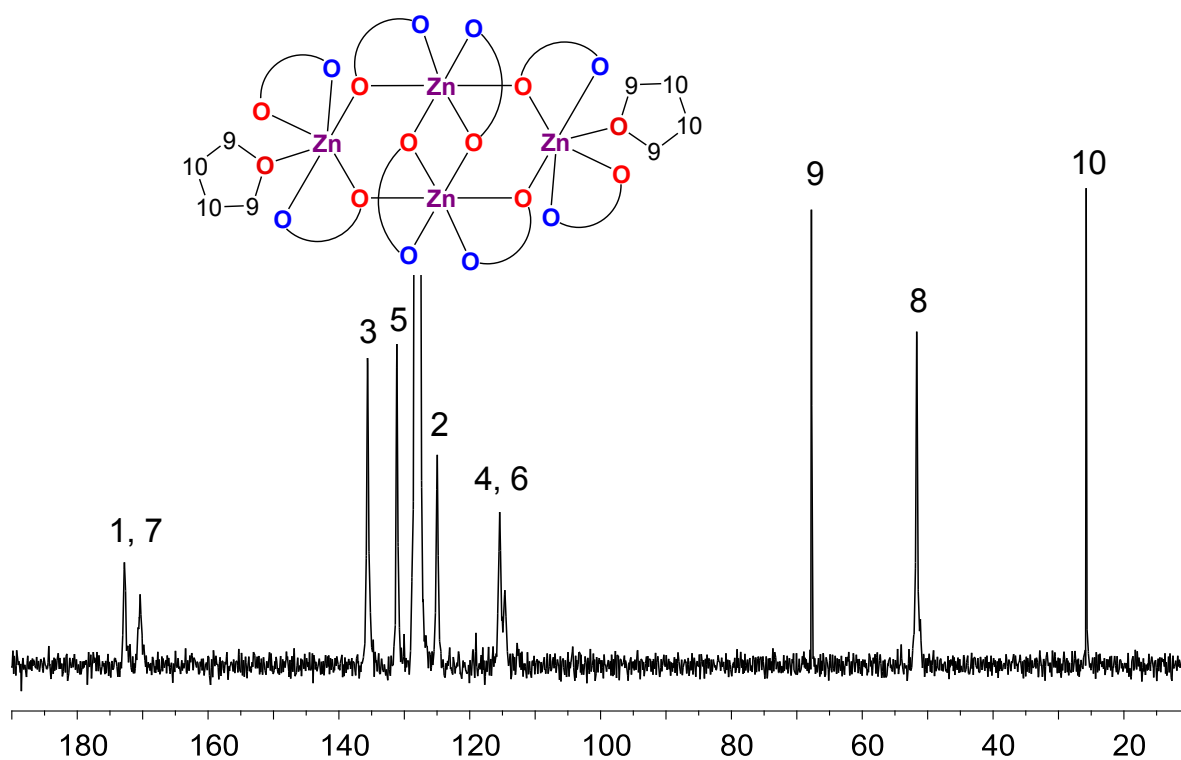

S20. <sup>13</sup>C NMR spectrum of **1**·2THF in C<sub>6</sub>D<sub>6</sub>.

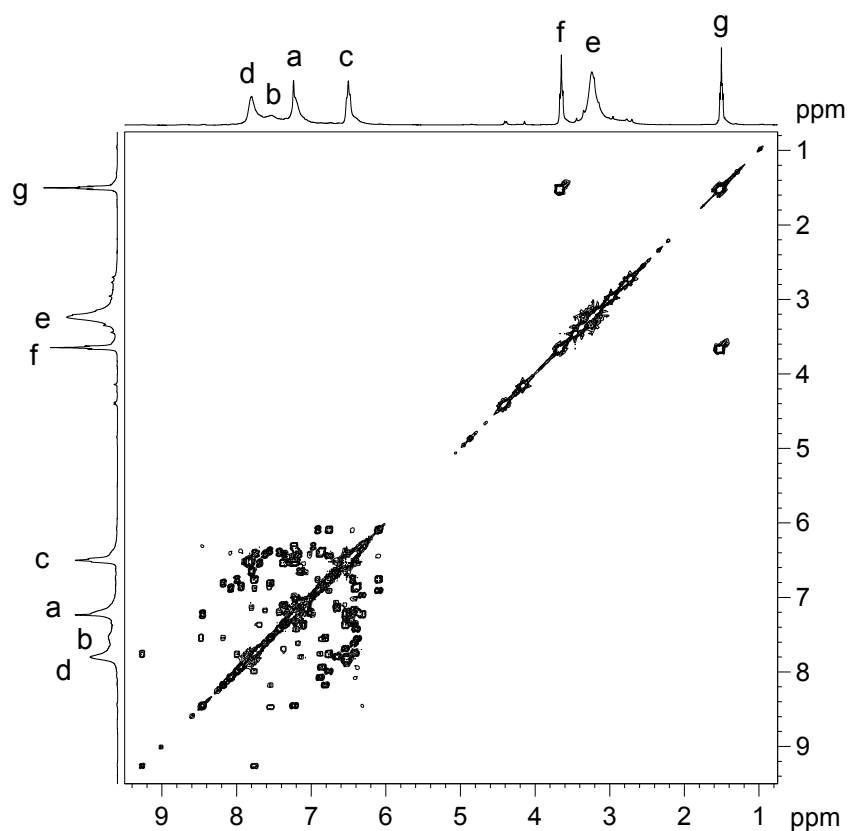

S21. COSY NMR spectrum of **1·2THF** in  $C_6D_6$ .

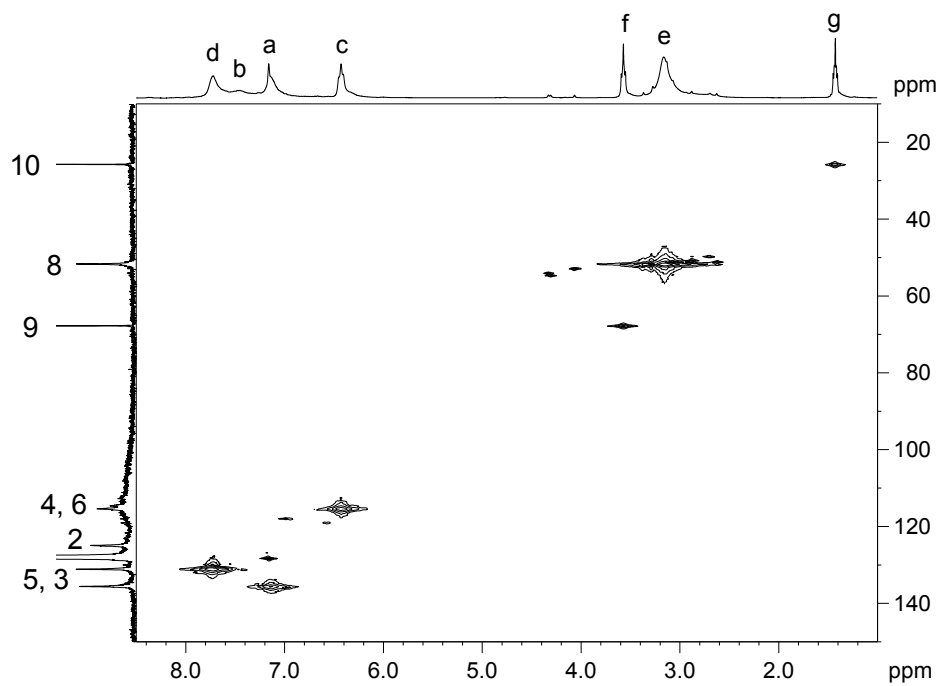

S22. HMQC NMR spectrum of **1·2THF** in  $C_6D_6$ .

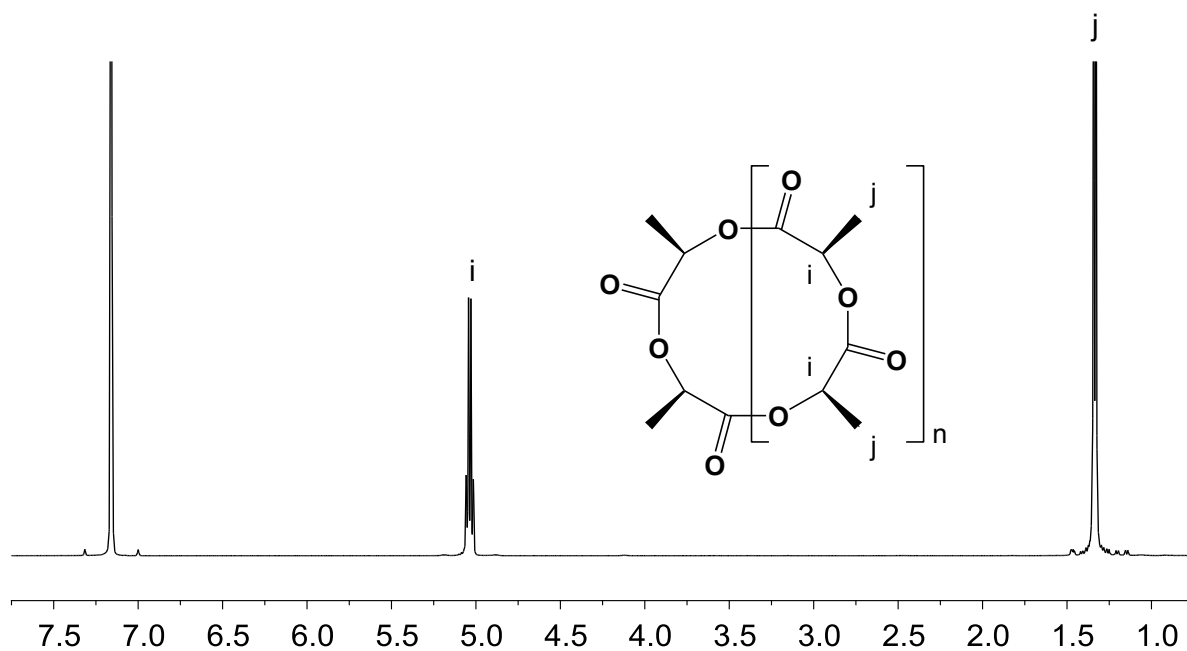

S23.  $^1\text{H}$  NMR spectrum of cPLLA in  $\text{C}_6\text{D}_6$ .

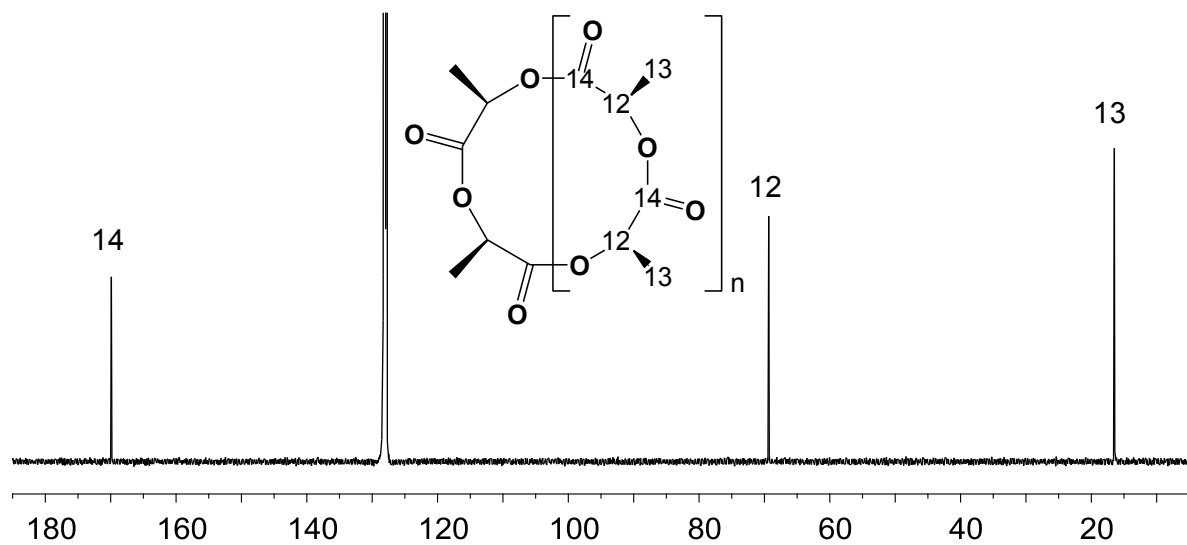

S24.  $^{13}\text{C}$  NMR spectrum of cPLLA in  $\text{C}_6\text{D}_6$ .

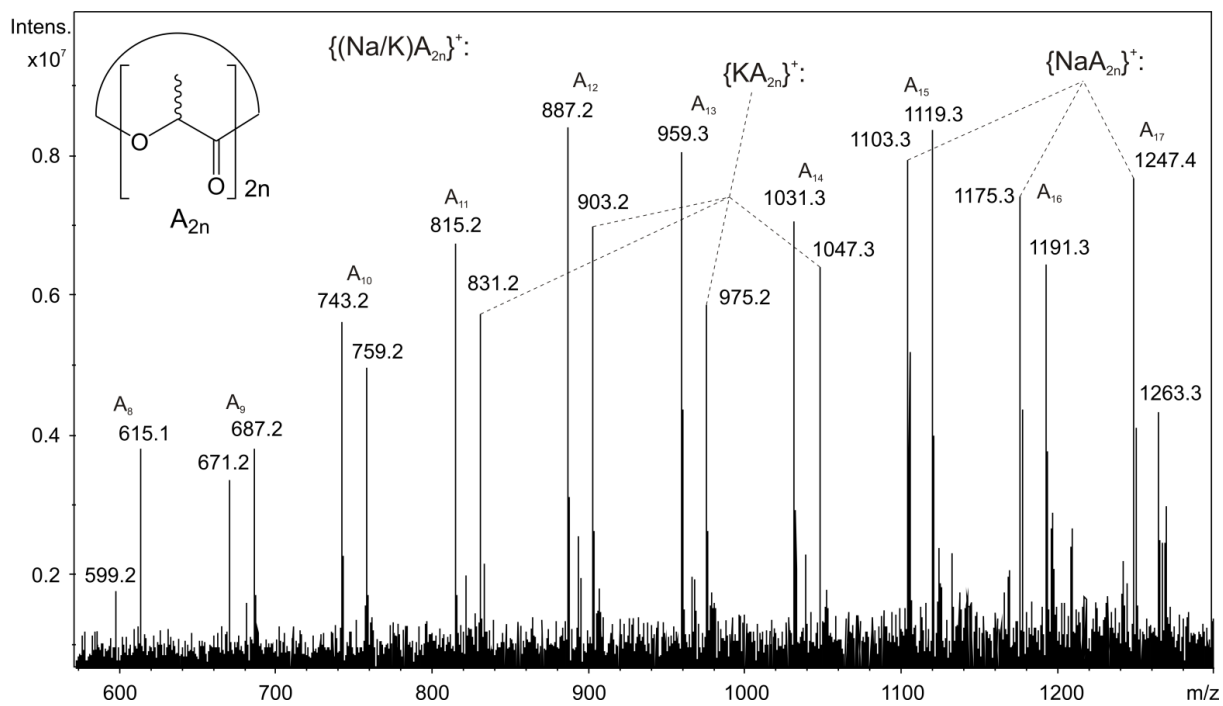

S25. ESI-MS spectrum of cPLLA.

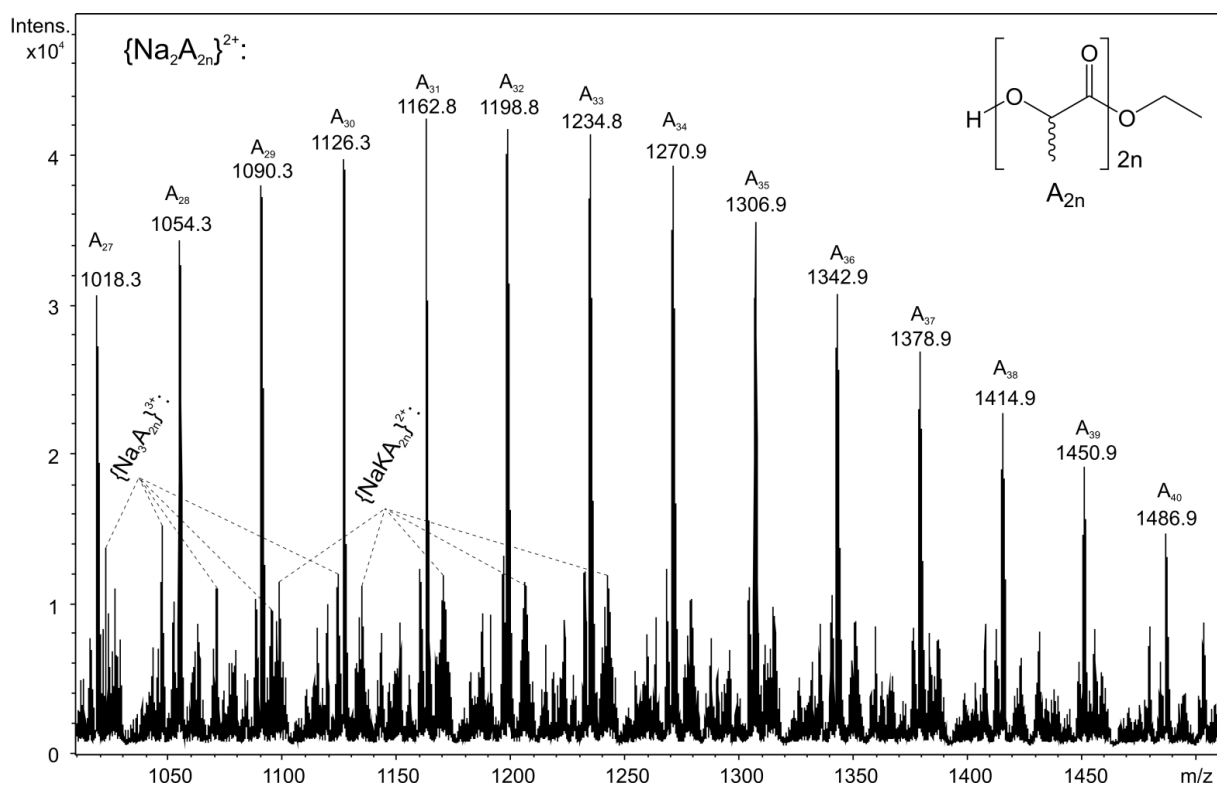

S26. ESI-MS spectrum of PLLA-OEt, obtained by quenching polymerization with EtOH.

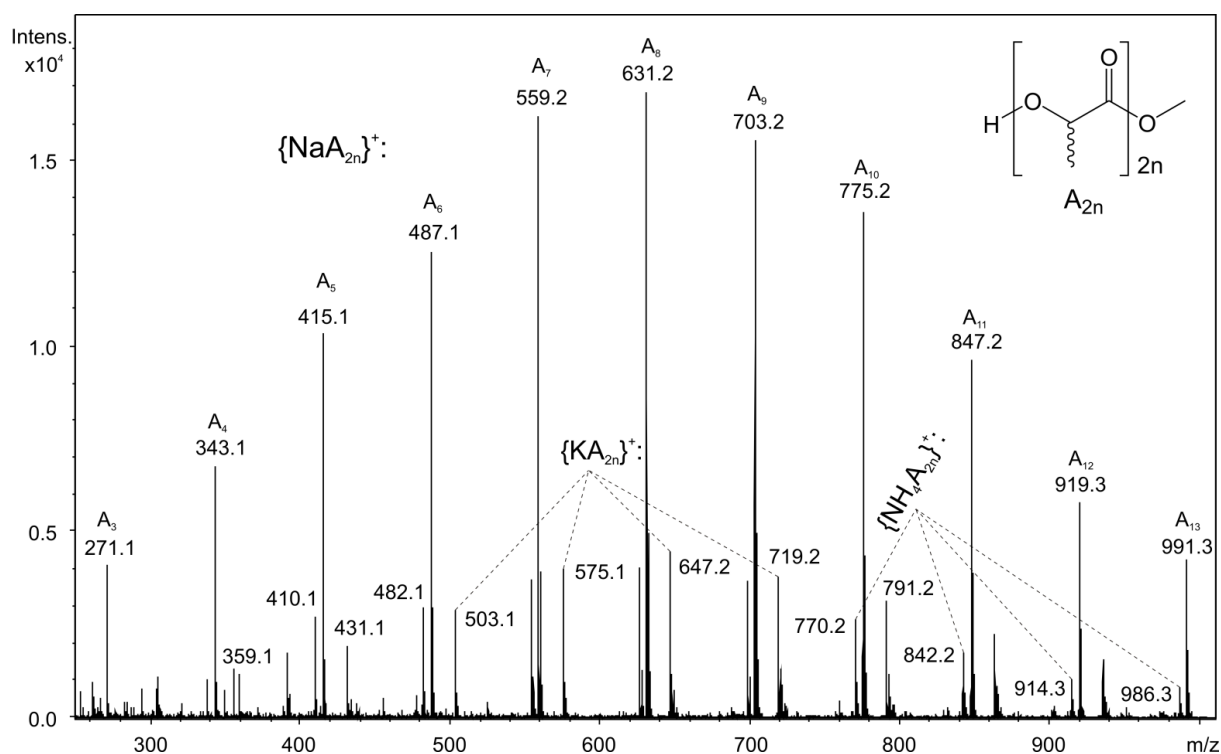

S27. ESI-MS spectrum of PLLA-OMe, obtained by quenching polymerization with MeOH.

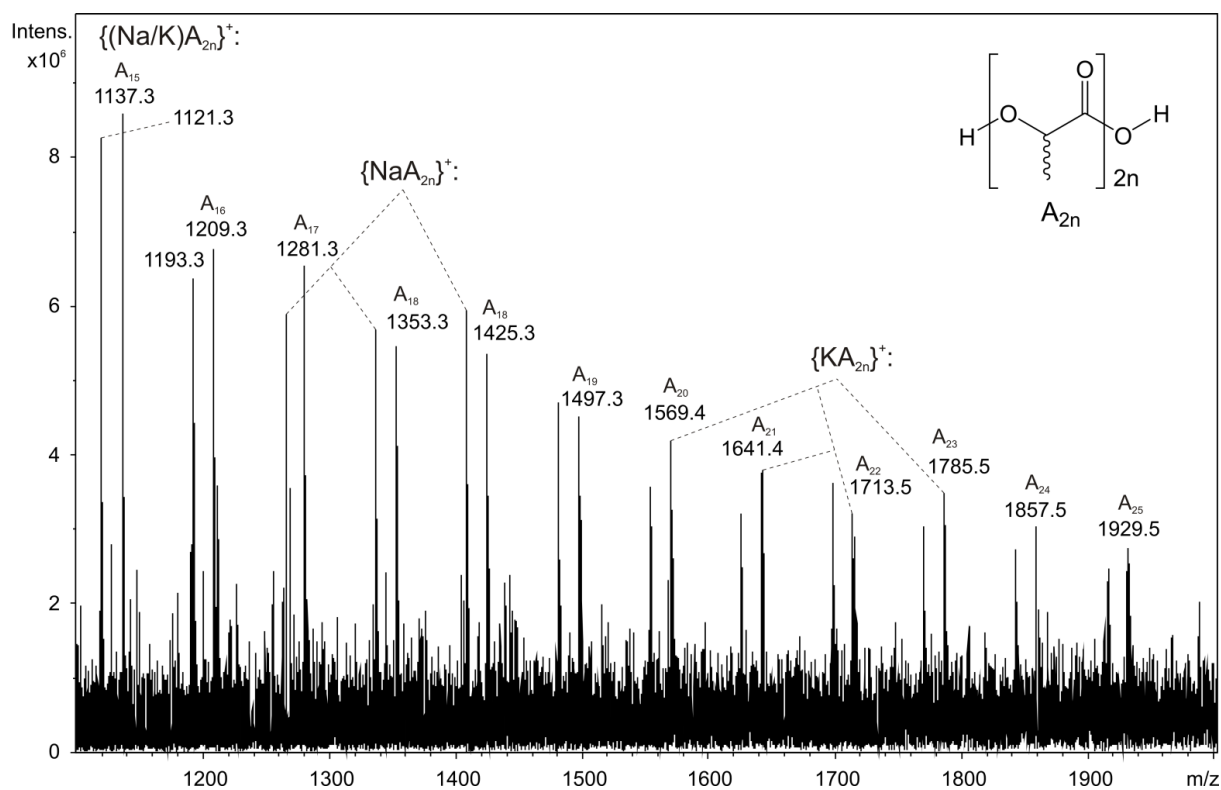

S28. ESI-MS spectrum of PLLA-OH, obtained by quenching polymerization with  $H_2O$ .



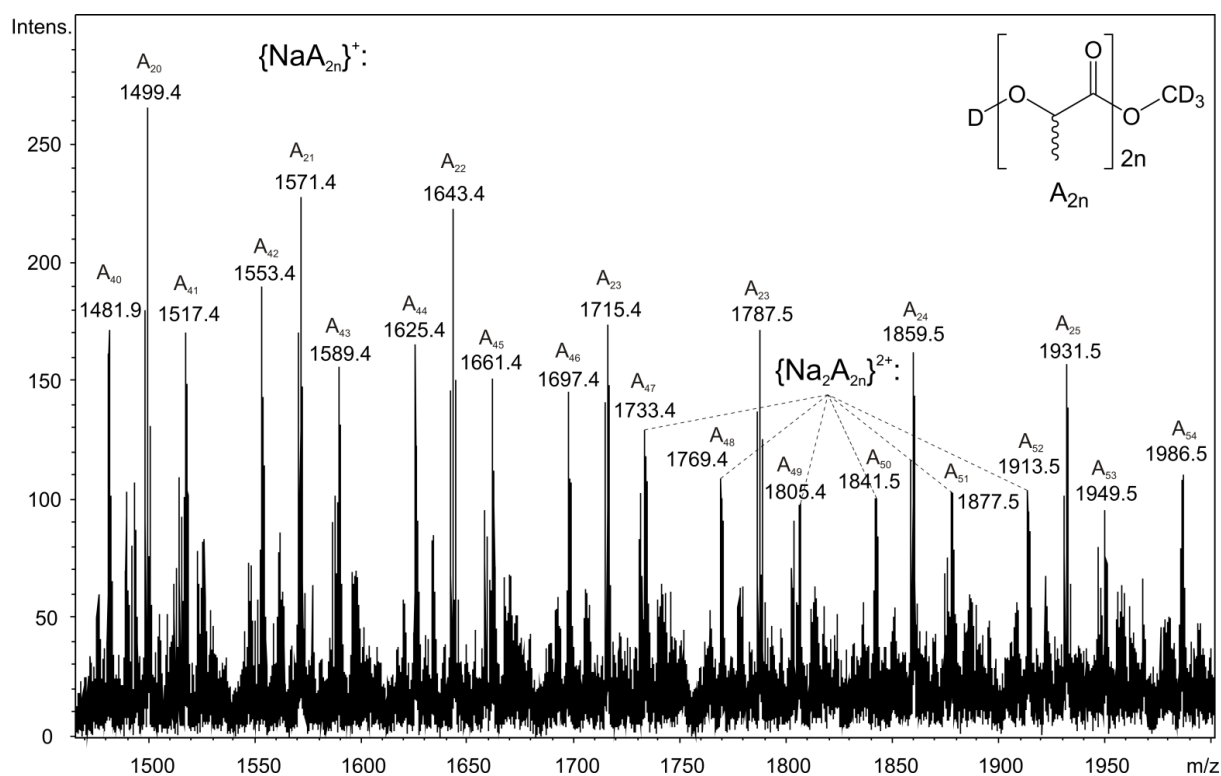

S29. ESI-MS spectrum of DO-PLLA-OCD<sub>3</sub>, obtained by quenching polymerization with CD<sub>3</sub>OD.

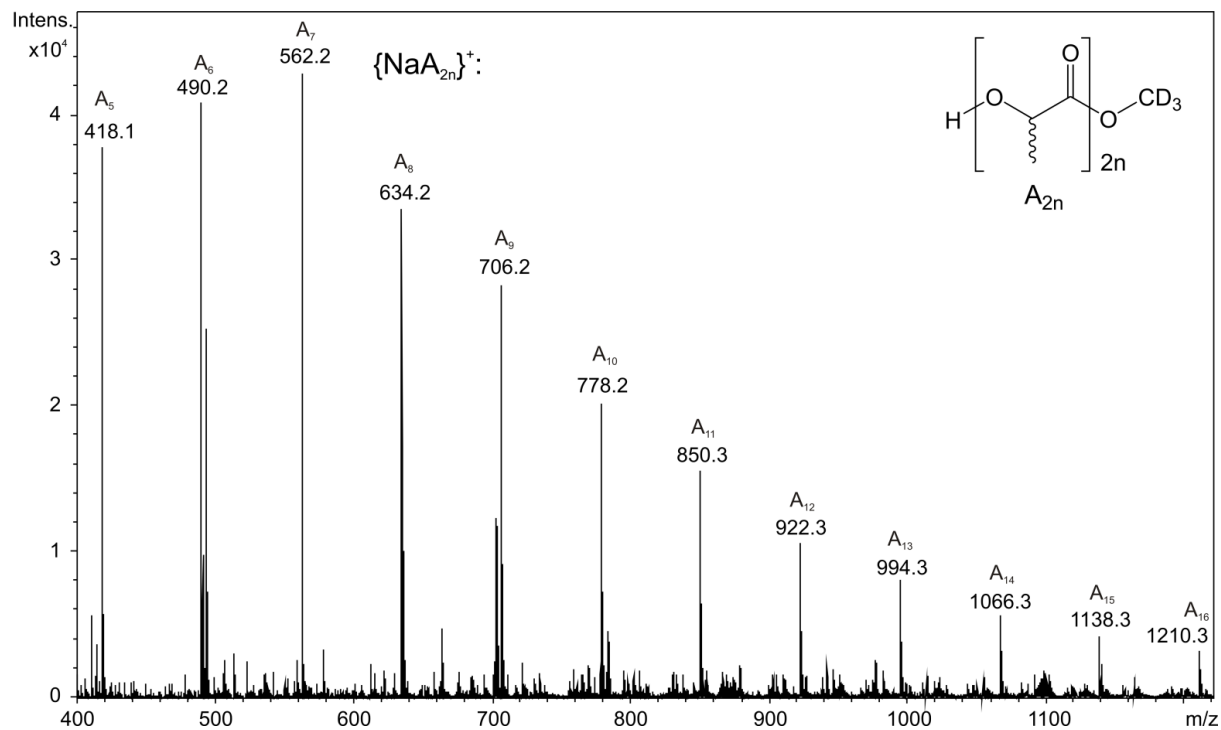

S30. ESI-MS spectrum of PLLA-OCD<sub>3</sub>, obtained by dissolving DO-PLLA-OCD<sub>3</sub> in EtOH.

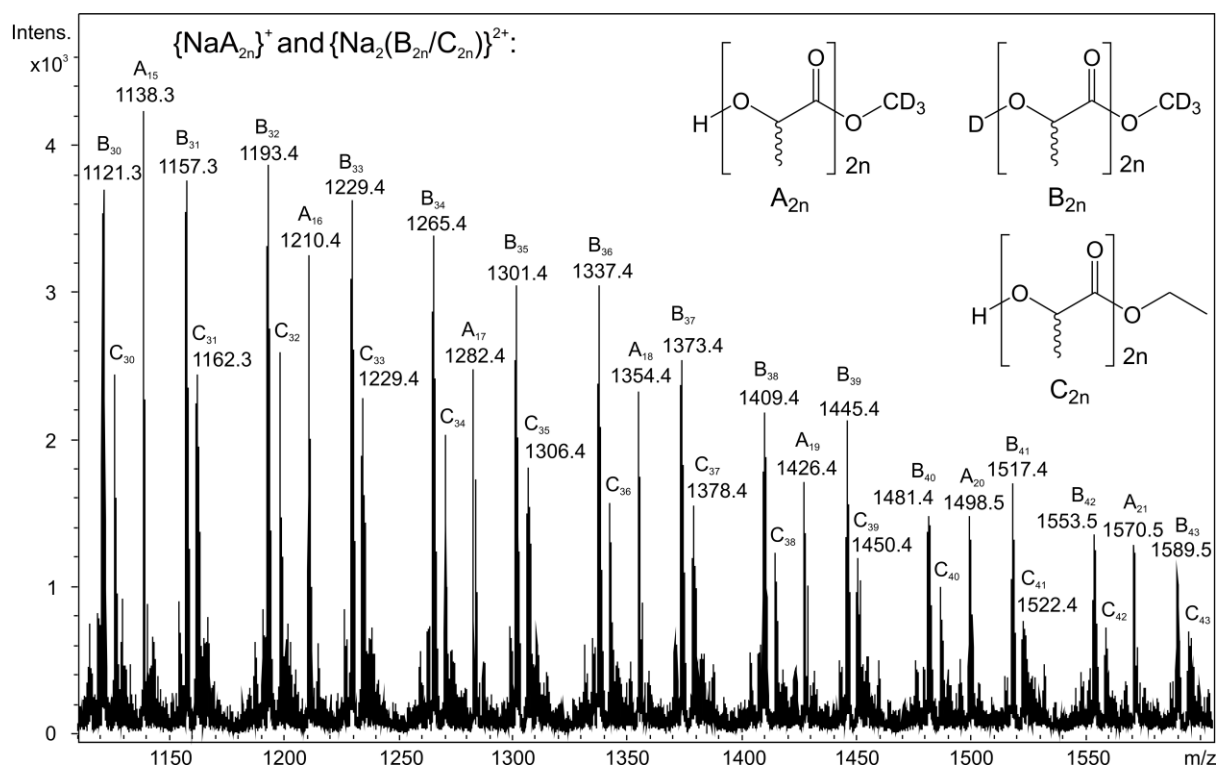

S31. ESI-MS spectrum of DO-PLLA-OCD<sub>3</sub>, PLLA-OCD<sub>3</sub> and PLLA-OEt, obtained by dissolving DO-PLLA-OCD<sub>3</sub> in EtOH.

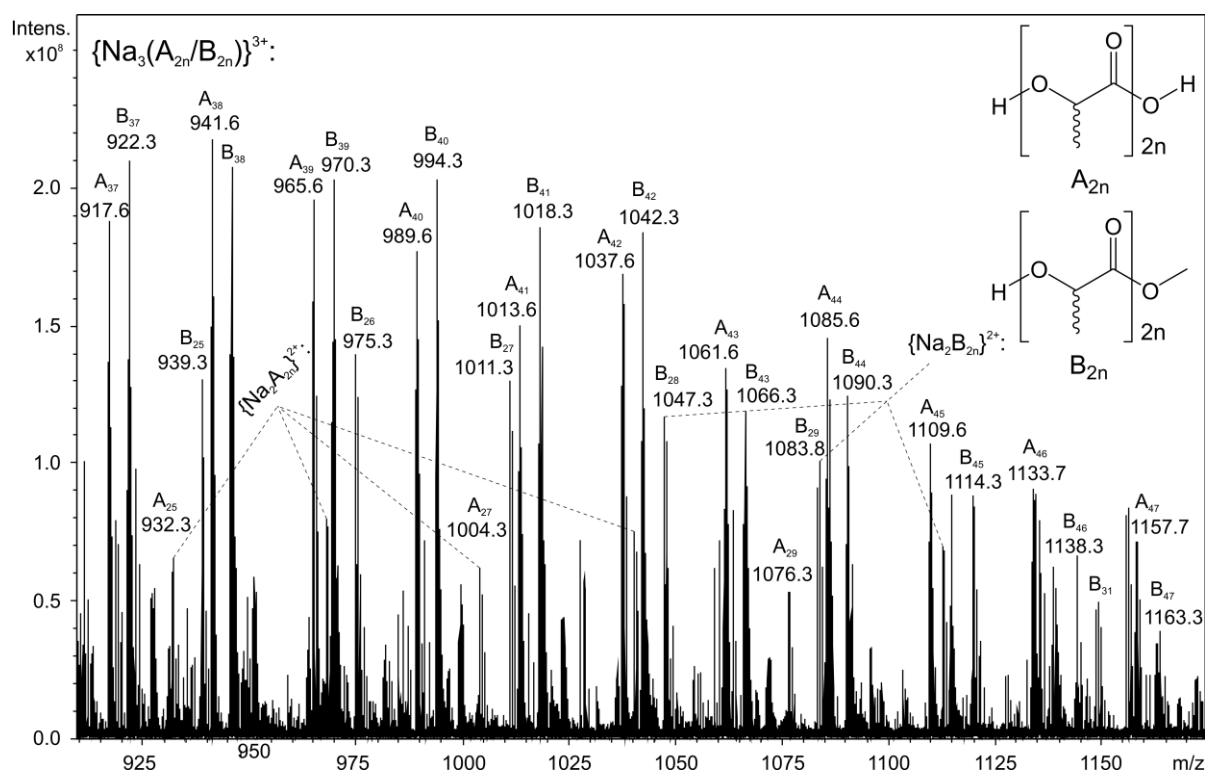

S32. ESI-MS spectrum of PLLA-OMe and PLLA-OH, obtained by quenching polymerization with mixture of MeOH/H<sub>2</sub>O.

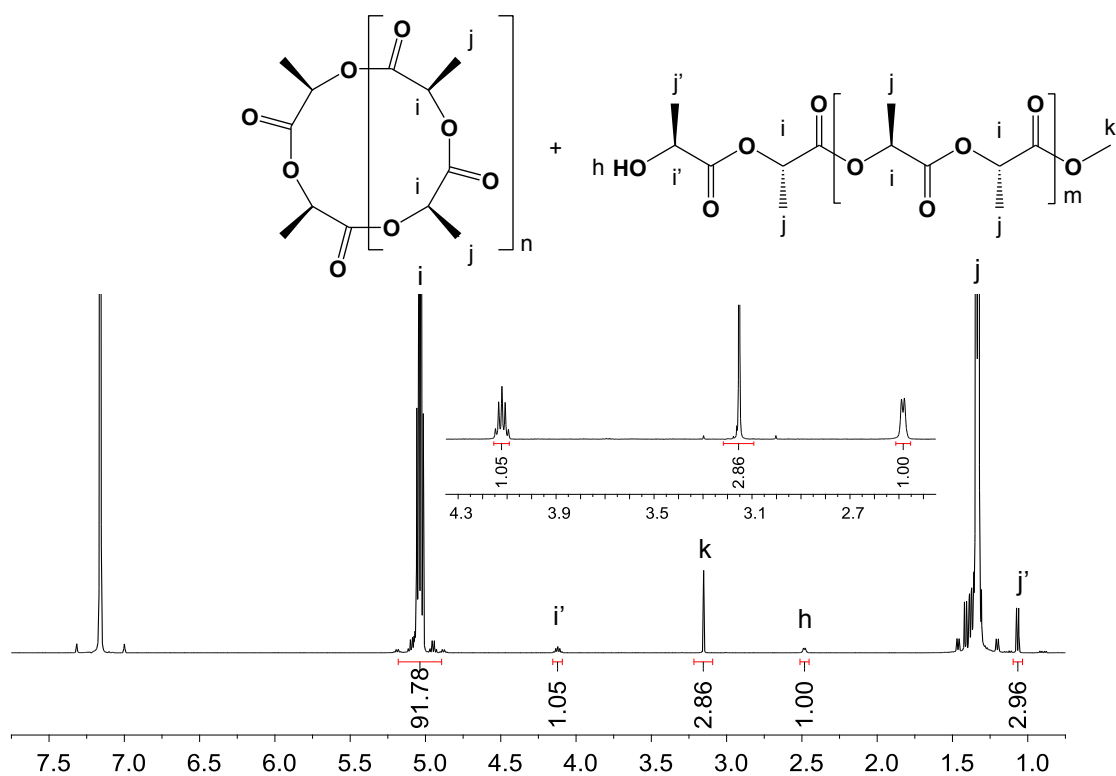

S33.  $^1\text{H}$  NMR spectrum in  $\text{C}_6\text{D}_6$  of mixture of cPLLA and PLLA-OMe obtained in reaction of **2** with L-LA in a L-LA/Zn = 25 ratio, and quenched with MeOH.

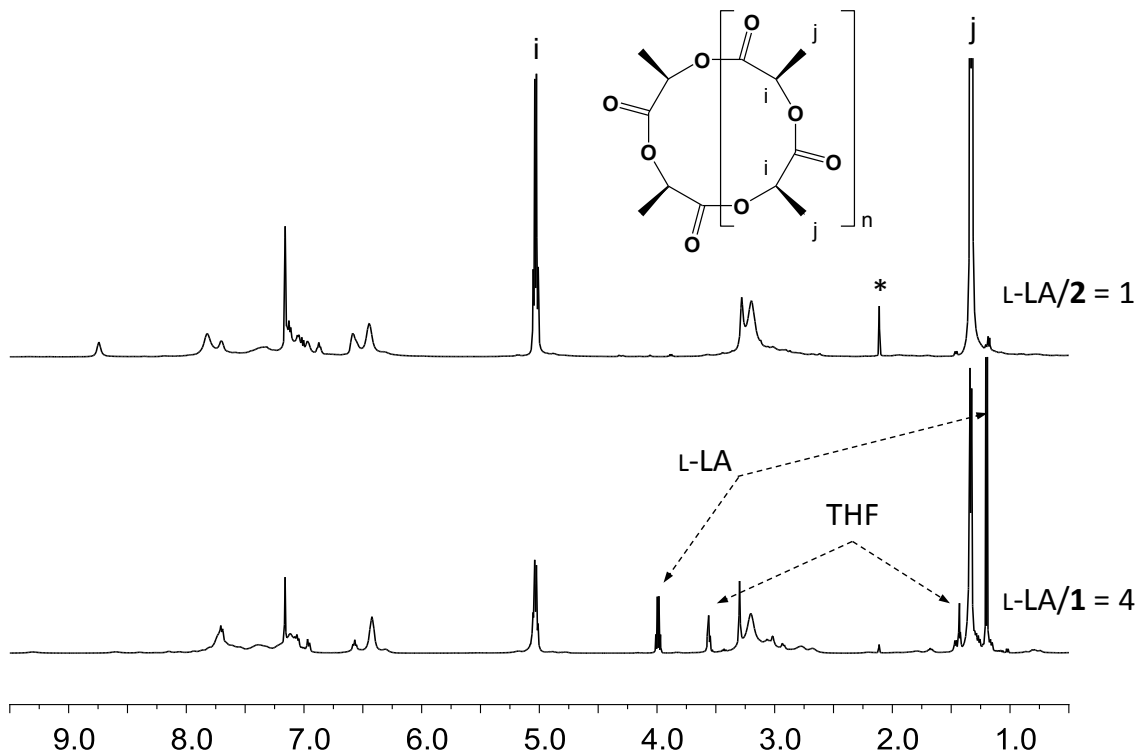

S34.  $^1\text{H}$  NMR spectra in  $\text{C}_6\text{D}_6$  of reaction products of **1** and **2** with L-LA conducted at a molar ratio of L-LA/Zn= 1. \* - denotes methyl of toluene.

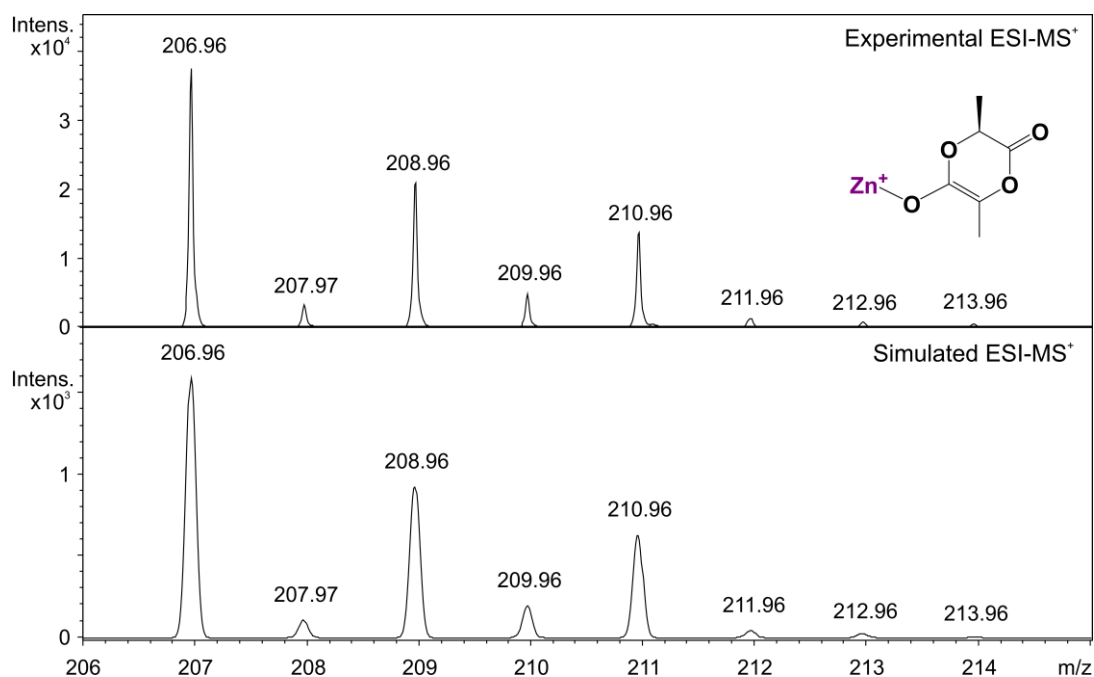

S35. Comparison of the 206-215 *m/z* fragment of the ESI-MS<sup>+</sup> spectrum with the isotopic distribution computed for the {[Zn(OLA)]<sup>+</sup>} moieties.

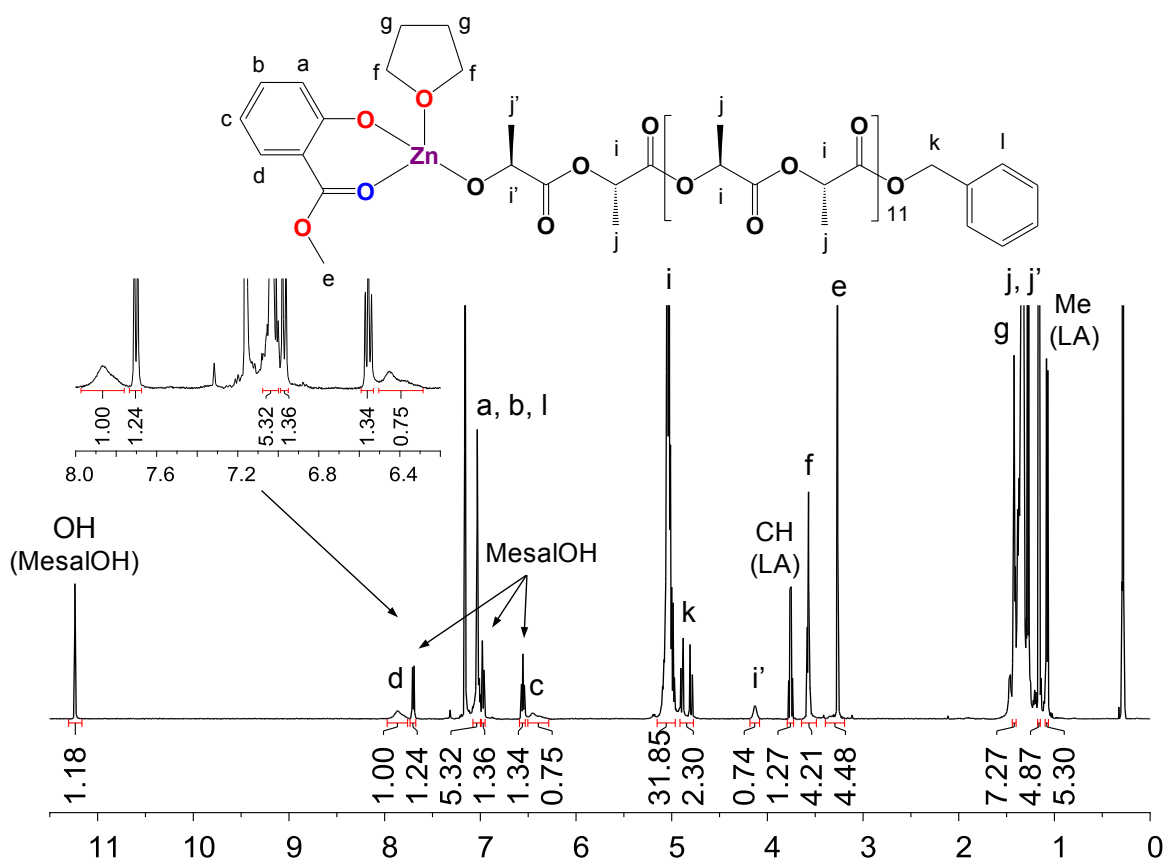

S36. <sup>1</sup>H NMR spectrum in C<sub>6</sub>D<sub>6</sub> of reaction products of **1** with 4 equiv of BnOH and L-LA conducted at a molar ratio of L-LA/Zn/BnOH = 10/1/1.

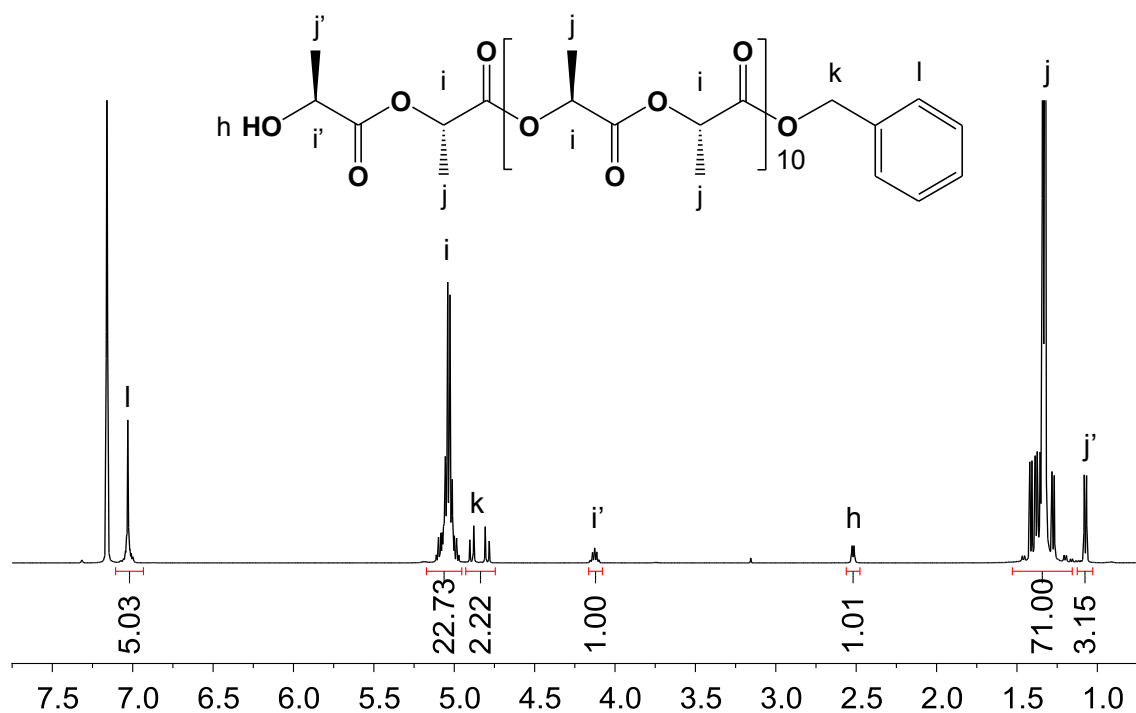

S37. <sup>1</sup>H NMR spectrum of PLLA-OBn in C<sub>6</sub>D<sub>6</sub>, obtained in reaction of **1** with L-LA in a L-LA/Zn = 10 ratio in the presence of BnOH, and quenched with MeOH.

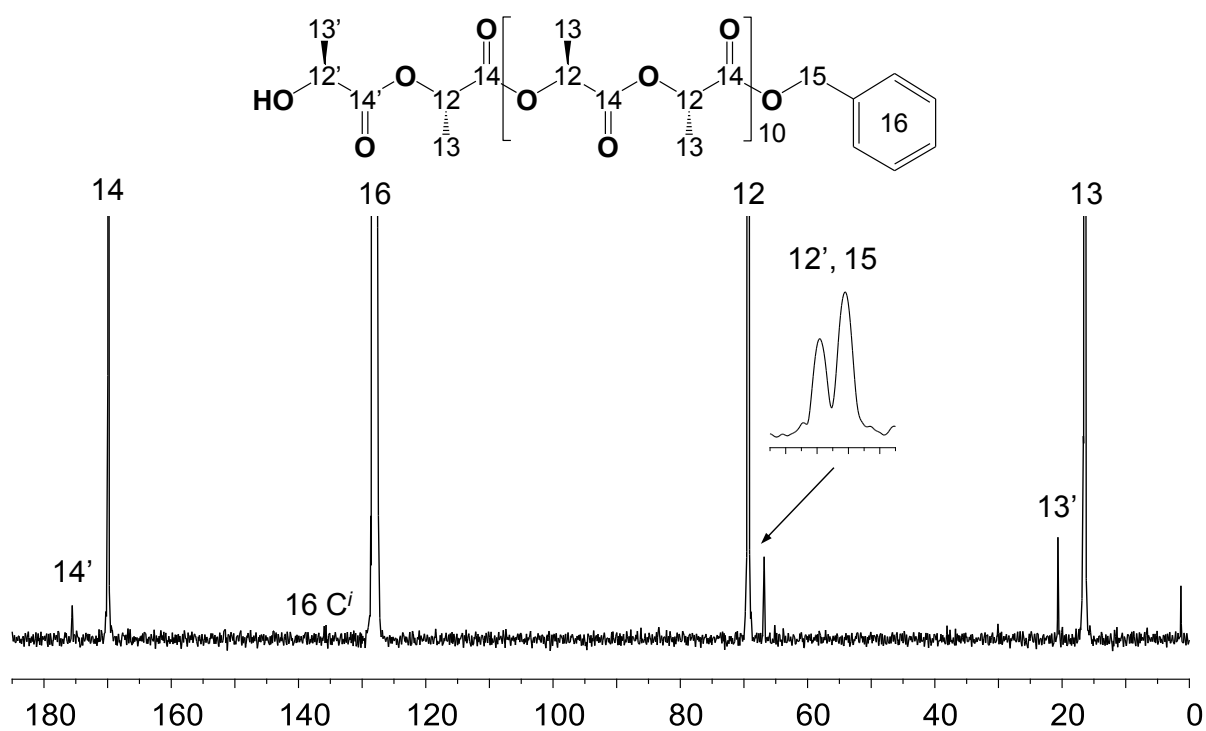

S38. <sup>13</sup>C NMR spectrum of PLLA-OBn in C<sub>6</sub>D<sub>6</sub>, obtained in reaction of **1** with L-LA in a L-LA/Zn = 10 ratio in the presence of BnOH, and quenched with MeOH.

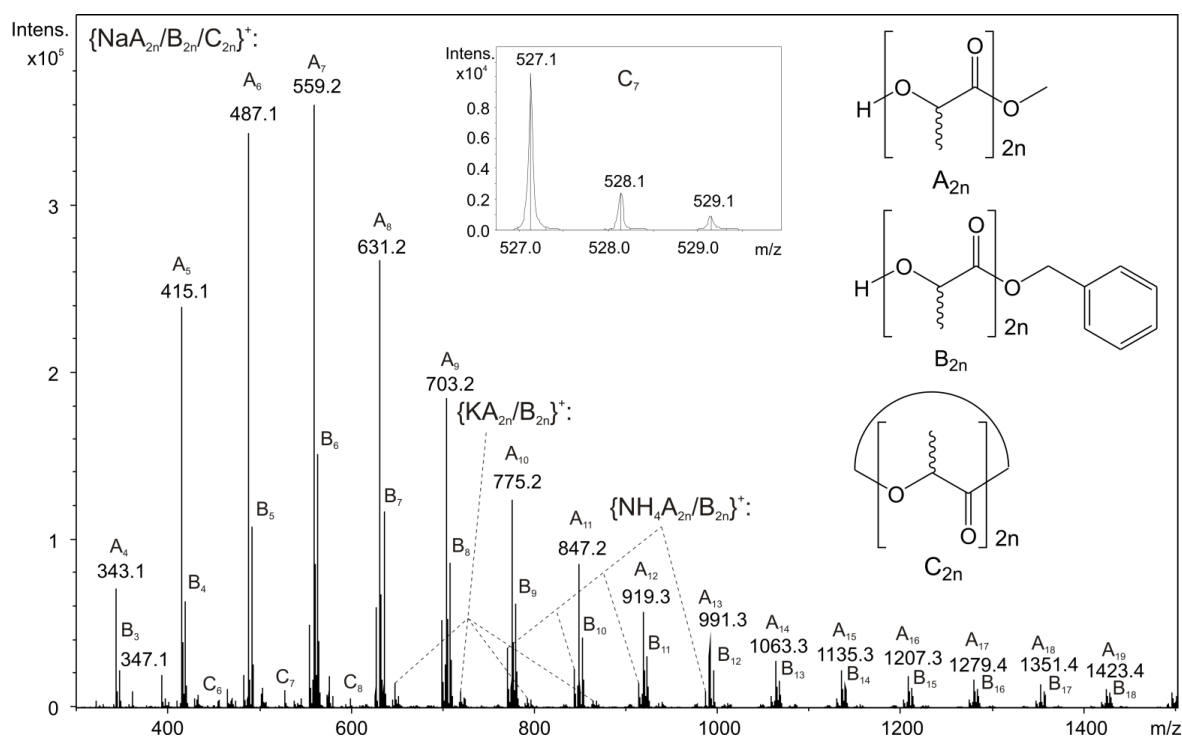

S39. ESI-MS spectrum of mixture of PLLA-OMe, PLLA-OBn and cPLLA, obtained in reaction of **1** with L-LA in L-LA/Zn = 10 ratio in the presence of BnOH, and quenched with MeOH.

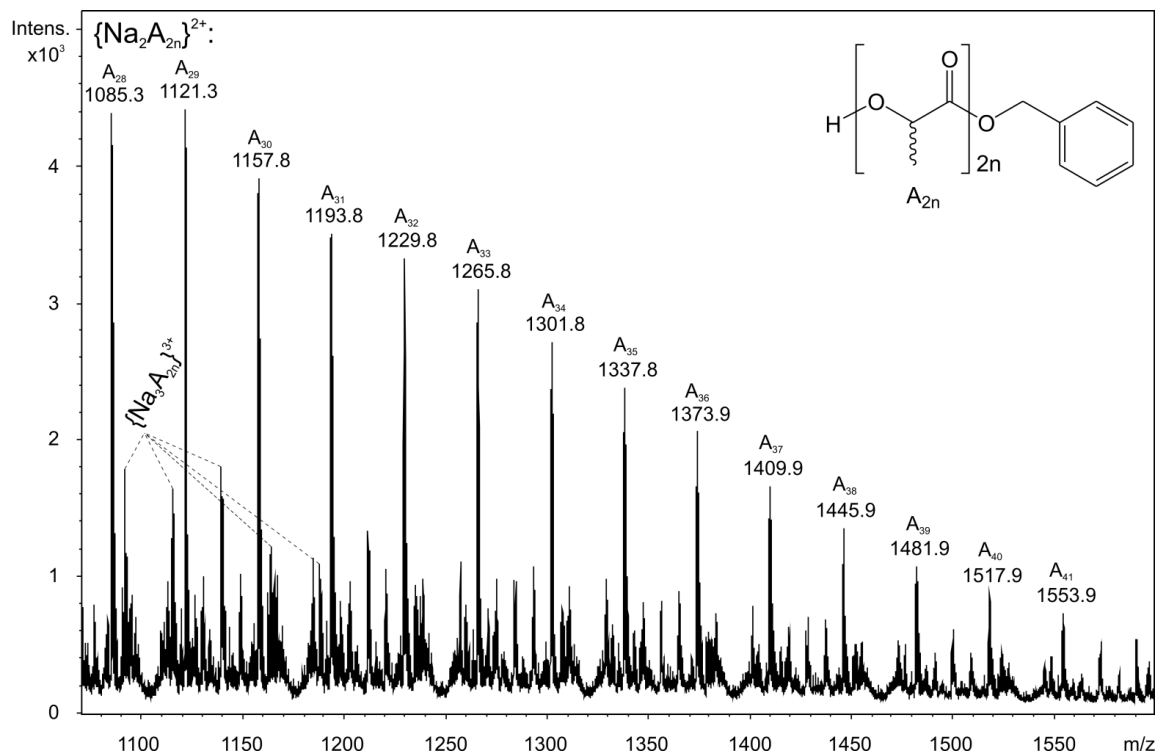

S40. ESI-MS spectrum of PLLA-OBn, obtained in reaction of **2** with L-LA in L-LA/Zn = 10 ratio in the presence of BnOH, and quenched with MeOH.

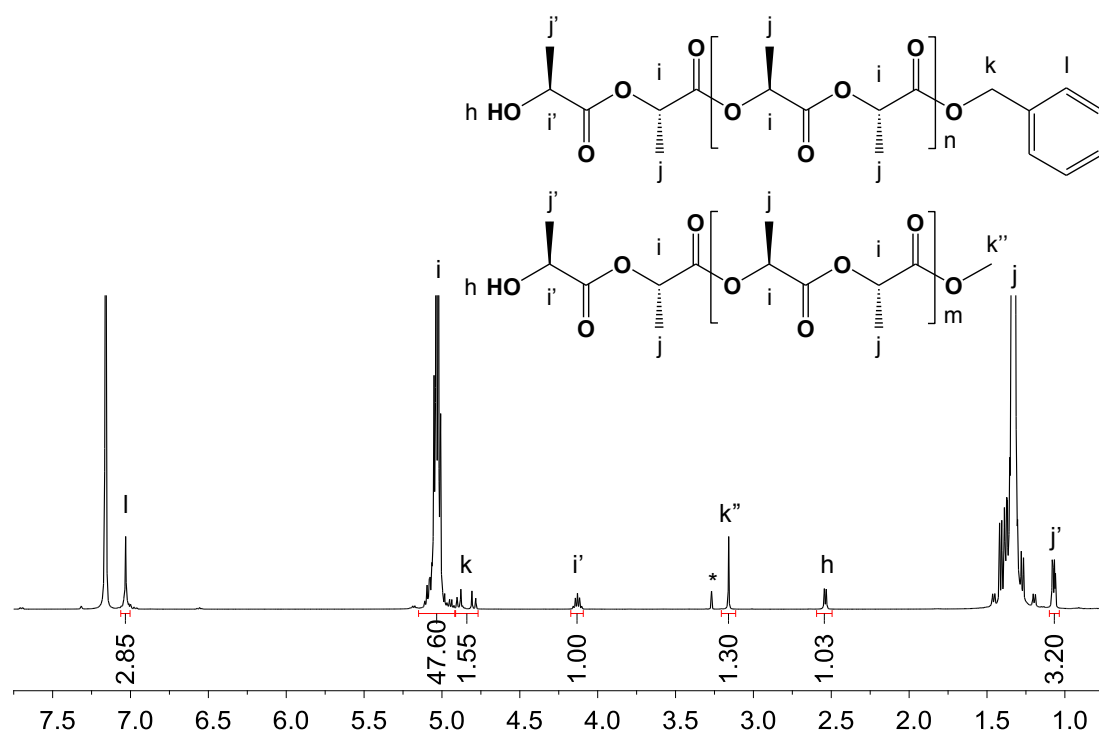

S41. <sup>1</sup>H NMR spectrum in C<sub>6</sub>D<sub>6</sub> of mixture of PLLA-OBn and PLLA-OMe obtained in reaction of **1** with L-LA in L-LA/Zn = 25 ratio in the presence of BnOH, and quenched with MeOH. \* - denotes free MesalOH.

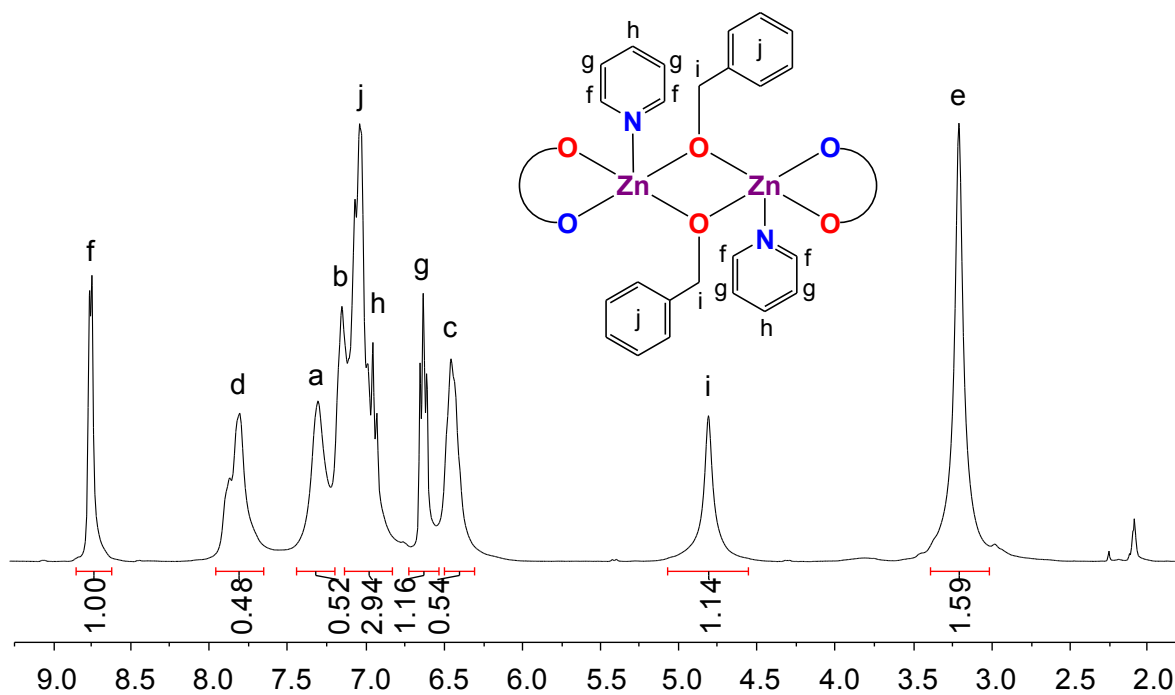

S42. <sup>1</sup>H NMR spectrum of **3** in C<sub>7</sub>D<sub>8</sub>.

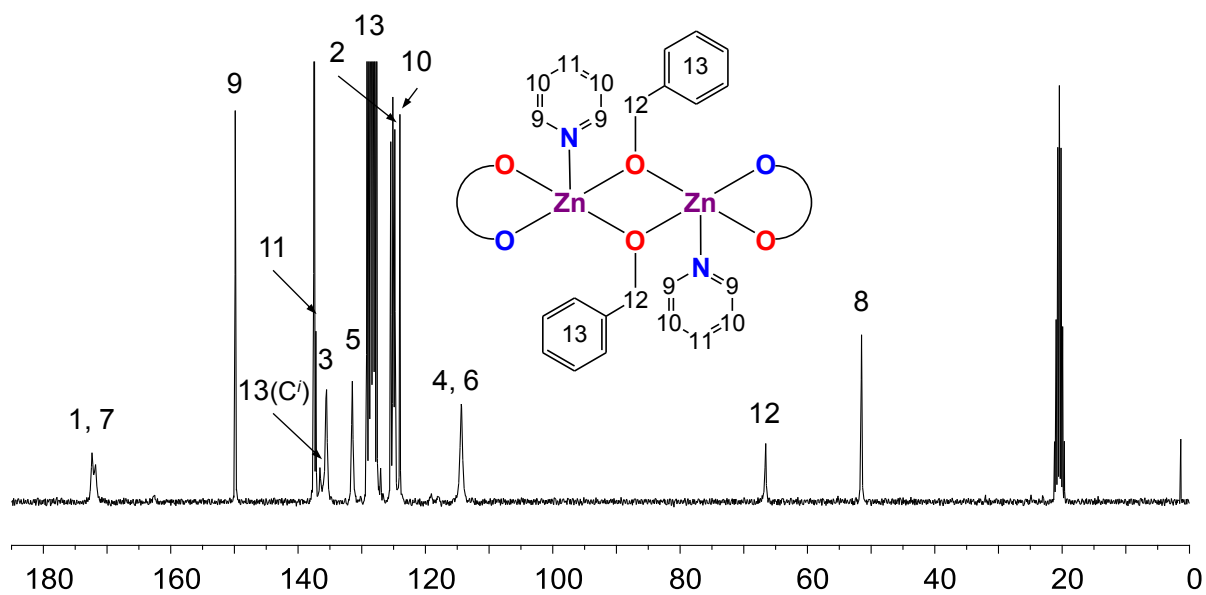

S43.  $^{13}\text{C}$  NMR spectrum of **3** in  $\text{C}_7\text{D}_8$ .

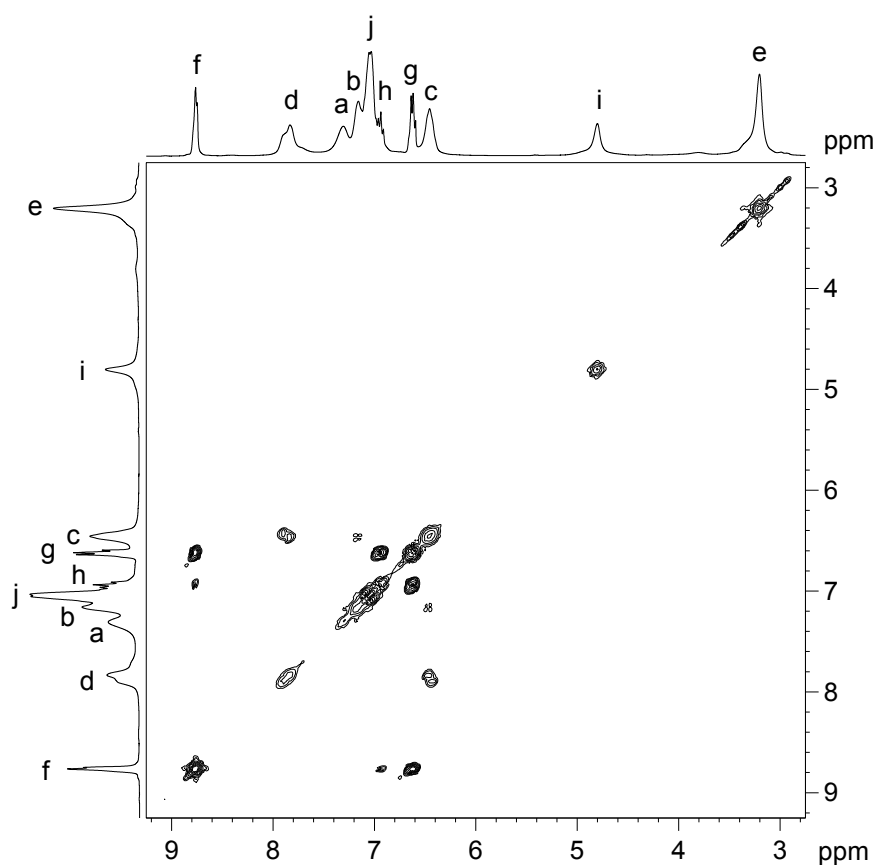

S44. COSY NMR spectrum of **3** in  $\text{C}_7\text{D}_8$ .



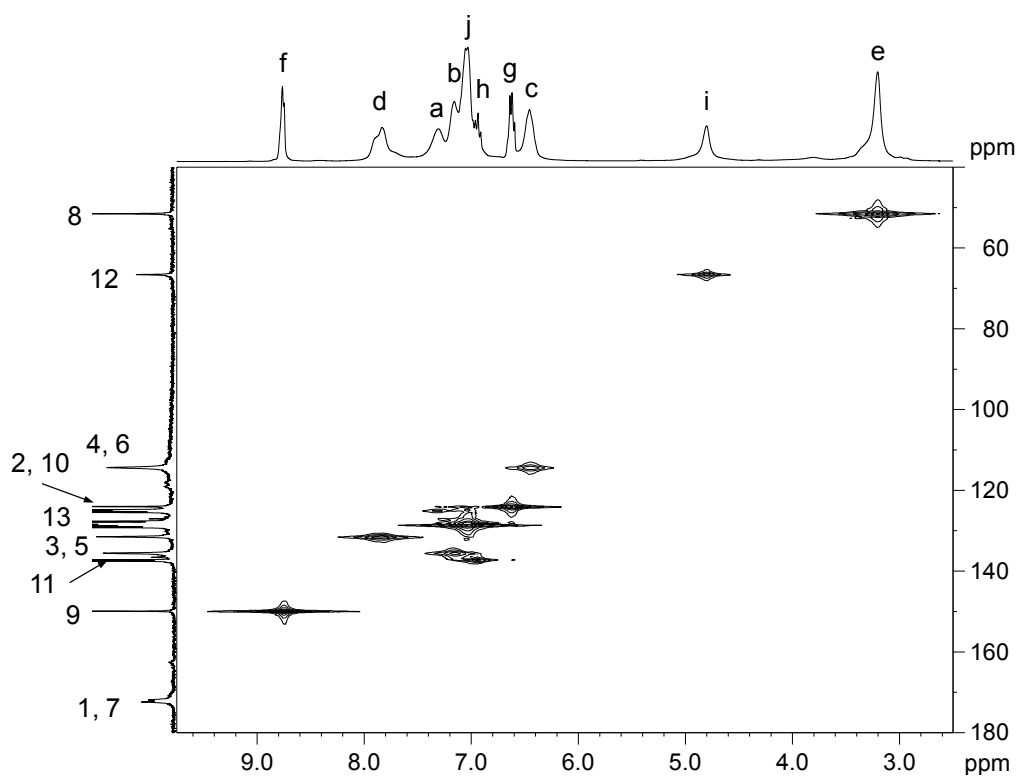

S45. HMQC NMR spectrum of **3** in  $C_7D_8$ .

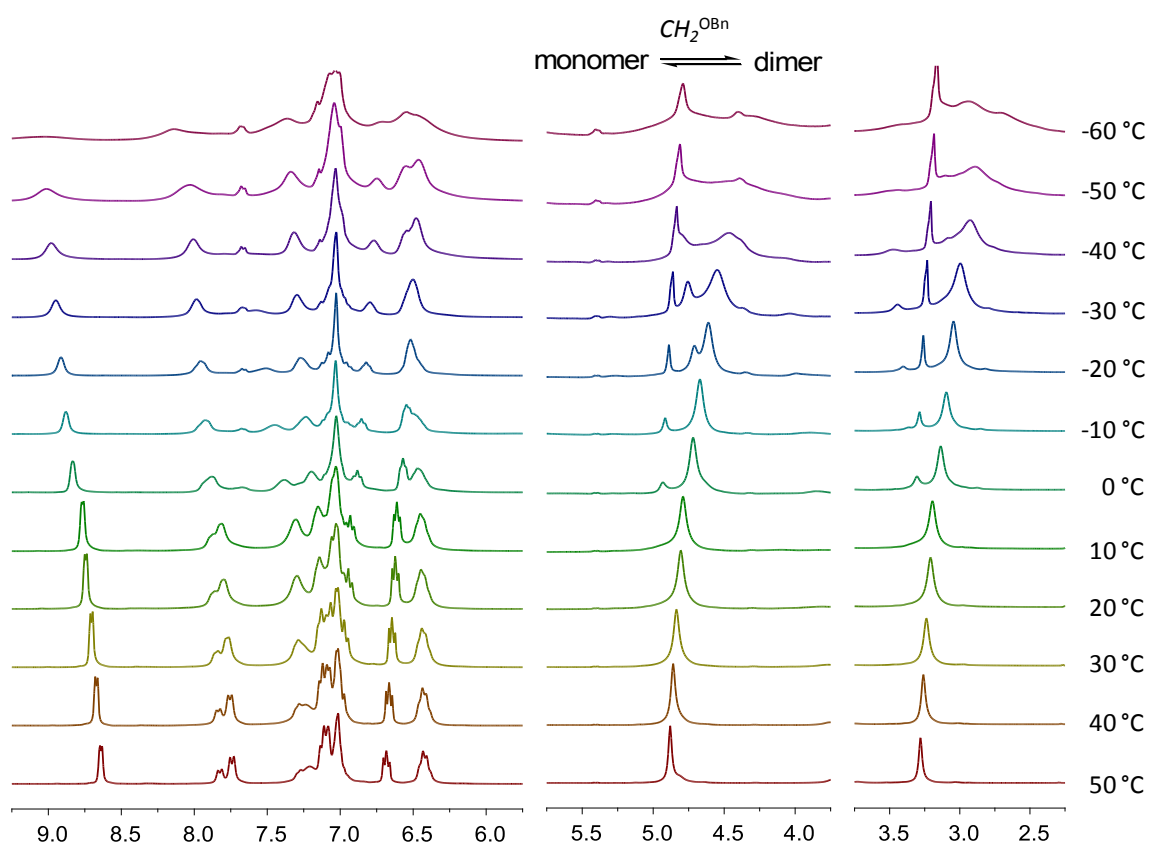

S46. VT  $^1H$  NMR spectra of **3** in  $C_7D_8$ .

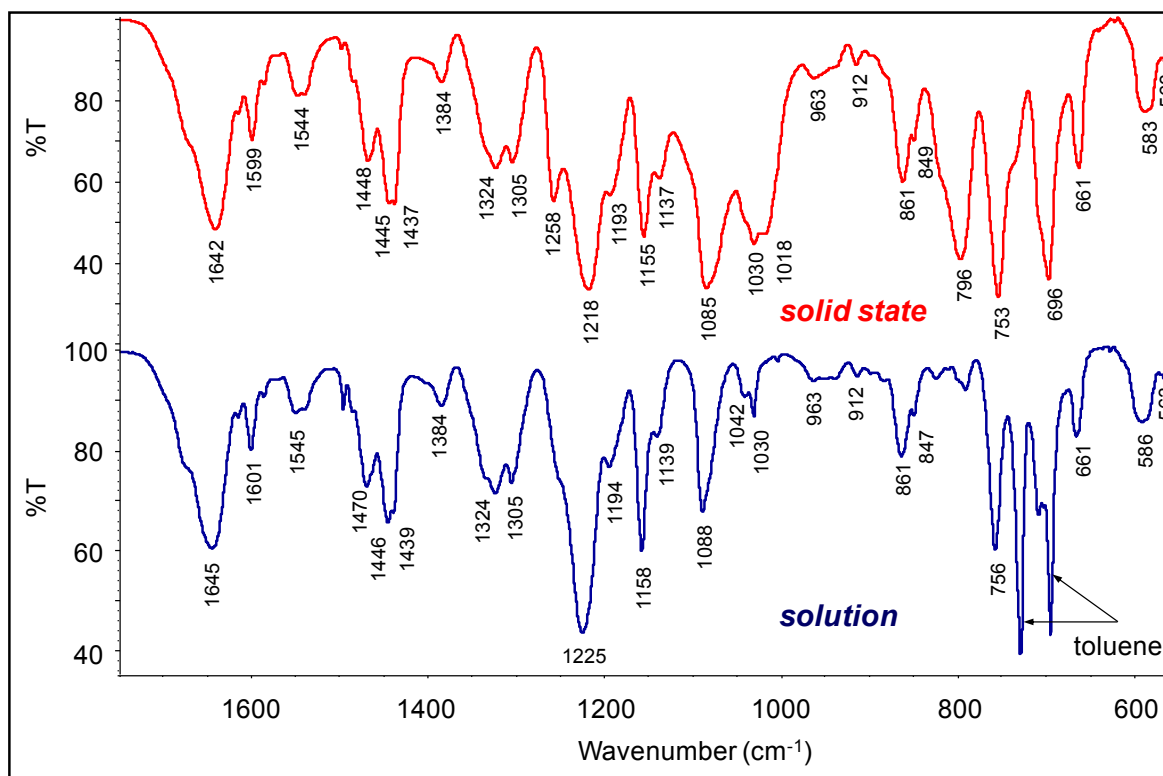

S47. FTIR-ATR spectra of **3** in solid state and in toluene solution.

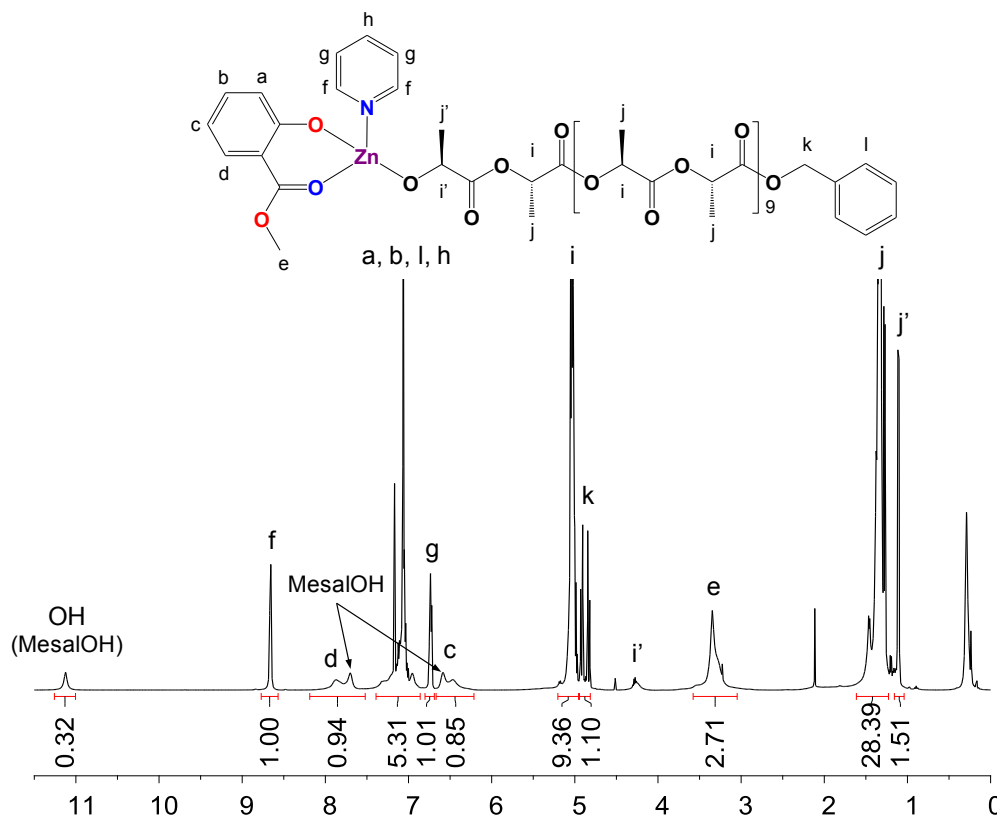

S48. <sup>1</sup>H NMR spectrum in C<sub>6</sub>D<sub>6</sub> of reaction products of **2** with BnOH and L-LA conducted at a molar ratio of L-LA/Zn/BnOH = 10/1/1.
